# Supplementary material
Source: PubMed Central journal article supplement (PMC7047740)
Supplement: NIHMS1560054-supplement-1.pdf [file NIHMS1560054-supplement-1.pdf]

## Supporting Information

### Footprints of Nanoscale DNA-Silver Cluster Chromophores *via* Activated-Electron Photodetachment Mass Spectrometry

Molly S. Blevins<sup>1</sup>, Dahye Kim<sup>2</sup>, Christopher M. Crittenden<sup>1</sup>, Soonwoo Hong<sup>3</sup>, Hsin-Chih Yeh<sup>3,4</sup>, Jeffrey T. Petty<sup>2</sup>, and Jennifer S. Brodbelt<sup>1\*</sup>

<sup>1</sup>Department of Chemistry, University of Texas at Austin, Austin, TX 78712, United States

<sup>2</sup>Department of Chemistry, Furman University, Greenville, SC 29613, United States

<sup>3</sup>Department of Biomedical Engineering, University of Texas at Austin, Austin, TX 78712, United States

<sup>4</sup>Texas Materials Institute, University of Texas at Austin, Austin, TX 78712, United States

\*Corresponding author: [jbroadbelt@cm.utexas.edu](mailto:jbroadbelt@cm.utexas.edu)

## Table of Contents

| Content                                                                                                                                       | Page |
|-----------------------------------------------------------------------------------------------------------------------------------------------|------|
| <b>Table S1:</b> Summarized ion type distributions and sequence coverage across charge states and fragmentation methods for ssDNA             | S3   |
| <b>Table S2:</b> Identified holo ions from deconvoluted a-EPD spectrum of 6- charge state of ssDNA-AgC                                        | S4   |
| <b>Table S3:</b> Sequences and masses of all DNA and DNA-AgC samples                                                                          | S5   |
| <b>Figure S1:</b> Absorption and emission spectra of the ssDNA-AgC and hpDNA-AgC complexes                                                    | S6   |
| <b>Figure S2:</b> Negative-mode deconvoluted MS1 spectra of ssDNA and ssDNA-AgC                                                               | S7   |
| <b>Figure S3:</b> Negative-mode deconvoluted MS1 spectra of hpDNA and hpDNA-AgC                                                               | S8   |
| <b>Figure S4:</b> MS1 spectra of ssDNA and ssDNA-AgC in 50:50 water:methanol and assignment of contaminants in hpDNA-AgC MS1 spectrum         | S9   |
| <b>Figure S5:</b> Positive-mode MS1 spectra of ssDNA and ssDNA-AgC                                                                            | S10  |
| <b>Figure S6:</b> HCD spectrum of 4- ssDNA with deconvoluted spectrum and sequence ion assignments                                            | S11  |
| <b>Figure S7:</b> UVPD spectrum of 4- ssDNA with deconvoluted spectrum and sequence ion assignments                                           | S12  |
| <b>Figure S8:</b> a-EPD spectrum of 4- ssDNA with deconvoluted spectrum and sequence ion assignments                                          | S13  |
| <b>Figure S9:</b> HCD spectrum of 5- ssDNA with deconvoluted spectrum and sequence ion assignments                                            | S14  |
| <b>Figure S10:</b> UVPD spectrum of 5- ssDNA with deconvoluted spectrum and sequence ion assignments                                          | S15  |
| <b>Figure S11:</b> a-EPD spectrum of 5- ssDNA with deconvoluted spectrum and sequence ion assignments                                         | S16  |
| <b>Figure S12:</b> HCD spectrum of 6- ssDNA with deconvoluted spectrum and sequence ion assignments                                           | S17  |
| <b>Figure S13:</b> UVPD spectrum of 6- ssDNA with deconvoluted spectrum and sequence ion assignments                                          | S18  |
| <b>Figure S14:</b> a-EPD spectrum of 6- ssDNA with deconvoluted spectrum and sequence ion assignments                                         | S19  |
| <b>Figure S15:</b> HCD spectrum of 4- ssDNA-AgC with deconvoluted spectrum and sequence ion assignments                                       | S20  |
| <b>Figure S16:</b> UVPD spectrum of 4- ssDNA-AgC with deconvoluted spectrum and sequence ion assignments                                      | S21  |
| <b>Figure S17:</b> a-EPD spectrum of 4- ssDNA-AgC with deconvoluted spectrum and sequence ion assignments                                     | S22  |
| <b>Figure S18:</b> HCD spectrum of 5- ssDNA-AgC with deconvoluted spectrum and sequence ion assignments                                       | S23  |
| <b>Figure S19:</b> UVPD spectrum of 5- ssDNA-AgC with deconvoluted spectrum and sequence ion assignments                                      | S24  |
| <b>Figure S20:</b> a-EPD spectrum of 5- ssDNA-AgC with deconvoluted spectrum and sequence ion assignments                                     | S25  |
| <b>Figure S21:</b> HCD spectrum of 6- ssDNA-AgC with deconvoluted spectrum and sequence ion assignments                                       | S26  |
| <b>Figure S22:</b> UVPD spectrum of 6- ssDNA-AgC with deconvoluted spectrum and sequence ion assignments                                      | S27  |
| <b>Figure S23:</b> a-EPD spectrum of 6- ssDNA-AgC with deconvoluted spectrum and sequence ion assignments                                     | S28  |
| <b>Figure S24:</b> Bar graphs of sequence coverage for ssDNA and ssDNA-AgC comparing all ion types vs. only <i>a-B</i> and <i>w</i> ion types | S29  |
| <b>Figure S25:</b> UVPD spectrum of 6- hpDNA-AgC with deconvoluted spectrum and sequence ion assignments (apo)                                | S30  |
| <b>Figure S26:</b> UVPD spectrum of 6- hpDNA-AgC with deconvoluted spectrum and sequence ion assignments (holo)                               | S31  |
| <b>Figure S27:</b> Isotopic distribution of ssDNA-AgC along with ppm error values                                                             | S32  |
| <b>Figure S28:</b> Isotopic distribution of hpDNA-AgC along with ppm error values                                                             | S33  |
| <b>Figure S29:</b> Comparison of 193 and 213 nm a-EPD for characterization of 6- charge state of ssDNA                                        | S34  |

# ssDNA

(a)

| ssDNA        |                      |                   |    |   |    |   |   |    |   |    |                   |                  |
|--------------|----------------------|-------------------|----|---|----|---|---|----|---|----|-------------------|------------------|
| Charge State | Fragmentation Method | Ion Count by Type |    |   |    |   |   |    |   |    | Seq. Coverage (%) |                  |
|              |                      | a-B               | a  | b | z  | y | c | d  | x | w  | All ion types     | Only a-B, w ions |
| 4-           | HCD                  | 9                 | 0  | 0 | 1  | 3 | 2 | 3  | 3 | 9  | 79                | 68               |
|              | UVPD                 | 14                | 5  | 0 | 3  | 0 | 1 | 4  | 3 | 16 | 89                | 89               |
|              | a-EPD                | 8                 | 9  | 0 | 6  | 1 | 1 | 10 | 4 | 11 | 74                | 58               |
| 5-           | HCD                  | 4                 | 0  | 3 | 0  | 5 | 2 | 2  | 4 | 4  | 53                | 42               |
|              | UVPD                 | 16                | 12 | 5 | 10 | 1 | 2 | 15 | 2 | 18 | 100               | 100              |
|              | a-EPD                | 15                | 16 | 6 | 17 | 0 | 8 | 15 | 7 | 18 | 100               | 100              |
| 6-           | HCD                  | 5                 | 0  | 3 | 0  | 5 | 4 | 2  | 4 | 4  | 53                | 47               |
|              | UVPD                 | 17                | 15 | 0 | 18 | 3 | 3 | 16 | 6 | 18 | 100               | 100              |
|              | a-EPD                | 14                | 15 | 0 | 16 | 0 | 8 | 15 | 4 | 18 | 100               | 95               |

(b)

# ssDNA•Ag<sub>10</sub>

| ssDNA-AgC    |                      |                   |   |   |   |   |   |   |   |   |                   |                  |
|--------------|----------------------|-------------------|---|---|---|---|---|---|---|---|-------------------|------------------|
| Charge State | Fragmentation Method | Ion Count by Type |   |   |   |   |   |   |   |   | Seq. Coverage (%) |                  |
|              |                      | a-B               | a | b | z | y | c | d | x | w | All ion types     | Only a-B, w ions |
| 4-           | HCD                  | 6                 | 0 | 0 | 0 | 4 | 3 | 2 | 4 | 4 | 53                | 53               |
|              | UVPD                 | 7                 | 1 | 0 | 0 | 2 | 0 | 2 | 2 | 6 | 74                | 68               |
|              | a-EPD                | 5                 | 0 | 0 | 0 | 4 | 3 | 4 | 3 | 4 | 53                | 47               |
| 5-           | HCD                  | 5                 | 0 | 1 | 0 | 4 | 2 | 2 | 5 | 3 | 47                | 42               |
|              | UVPD                 | 7                 | 0 | 0 | 0 | 0 | 0 | 5 | 0 | 6 | 74                | 68               |
|              | a-EPD                | 7                 | 2 |   | 1 | 4 | 5 | 5 | 2 | 8 | 84                | 74               |
| 6-           | HCD                  | 3                 | 0 | 1 | 0 | 4 | 3 | 1 | 4 | 3 | 47                | 32               |
|              | UVPD                 | 9                 | 1 | 0 | 1 | 0 | 0 | 5 | 0 | 6 | 79                | 79               |
|              | a-EPD                | 7                 | 0 | 1 | 1 | 4 | 3 | 5 | 3 | 8 | 74                | 74               |

**Table S1.** Summarized tables of ion type distributions and sequence coverage across various charge states and fragmentation methods for ssDNA CCC CAA CTC CTT CCC GCC AC (a) without and (b) with silver cluster. Above tables were used to create main text **Figure 2** and **Figure S23**.

## ssDNA•Ag<sub>10</sub> holo ions

| Ion | Type | Mass (Exp) | Mass (Theo) | Error (Da) | Error (ppm) |
|-----|------|------------|-------------|------------|-------------|
| 10  | a-B  | 3835.444   | 3831.52298  | 3.92       | 1022.8      |
| 12  | a-B  | 4426.547   | 4424.61498  | 1.93       | 436.6       |
| 13  | a-B  | 4732.591   | 4728.66098  | 3.93       | 830.8       |
| 14  | a-B  | 5020.634   | 5017.70698  | 2.93       | 583.2       |
| 15  | a-B  | 5309.679   | 5306.75298  | 2.93       | 551.2       |
| 16  | a-B  | 5598.724   | 5595.79898  | 2.93       | 522.6       |
| 17  | a-B  | 5926.777   | 5924.85098  | 1.93       | 325.0       |
| 18  | a-B  | 6217.823   | 6213.89698  | 3.93       | 631.6       |
| 19  | a-B  | 6504.867   | 6502.94298  | 1.92       | 295.8       |
| 10  | w    | 4073.468   | 4071.53798  | 1.93       | 473.9       |
| 11  | w    | 4362.513   | 4360.58398  | 1.93       | 442.3       |
| 12  | w    | 4652.558   | 4649.62998  | 2.93       | 629.5       |
| 13  | w    | 4955.602   | 4953.67498  | 1.93       | 388.9       |
| 14  | w    | 5247.648   | 5242.72098  | 4.93       | 939.3       |
| 15  | w    | 5558.704   | 5555.77898  | 2.93       | 526.3       |
| 16  | w    | 5870.76    | 5868.83598  | 1.92       | 327.8       |
| 17  | w    | 6159.805   | 6157.88198  | 1.92       | 312.2       |
| 18  | w    | 6450.85    | 6446.92798  | 3.92       | 608.2       |
| 19  | w    | 6738.894   | 6735.97398  | 2.92       | 433.4       |

**Table S2.** Table of identified holo ions from deconvoluted a-EPD spectrum of 6- charge state of single stranded 20-mer oligonucleotide CCC CAA CTC CTT CCC GCC AC with silver cluster. Table highlights systematic mass shifts of 1.9, 2.9, 3.9, and 4.9 Da observed for deconvoluted holo ions due to the interference of Ag isotope patterns with the utilized deconvolution method. This effect is also seen in the deconvoluted a-EPD spectra – instead of a single deconvoluted holo ion peak, we observe groups of holo ion peaks separated by multiples of 1.0 Da, further highlighting the systematic deconvolution mass errors that occur when ions containing silver atoms are deconvoluted. The columns entitled Ion and Type indicate the assignment of the fragment ion: a<sub>n</sub>-B or w<sub>n</sub> in which the number n (listed in Ion column) represents the number of nucleotides contained in the fragment.

| DNA       | Sequence                                                         | Length (nt) | Exact Mass (Da) |
|-----------|------------------------------------------------------------------|-------------|-----------------|
| ssDNA     | CCC CAA CTC CTT CCC GCC AC                                       | 20          | 5876.003        |
| hpDNA     | CCC CAA CTC CTT <u>CCC GCC</u> TTT <u>TGG CGG G</u>              | 28          | 8424.389        |
| ssDNA-AgC | CCC CAA CTC CTT CCC GCC AC + <b>AgC</b>                          | 20          | 6945.054        |
| hpDNA-AgC | CCC CAA CTC CTT <u>CCC GCC</u> TTT <u>TGG CGG G</u> + <b>AgC</b> | 28          | 9493.440        |

**Table S3.** Sequences and masses of all DNA and DNA-AgC samples studied. All sequences are listed from 5' to 3' end, and DNA hairpin regions are underlined.

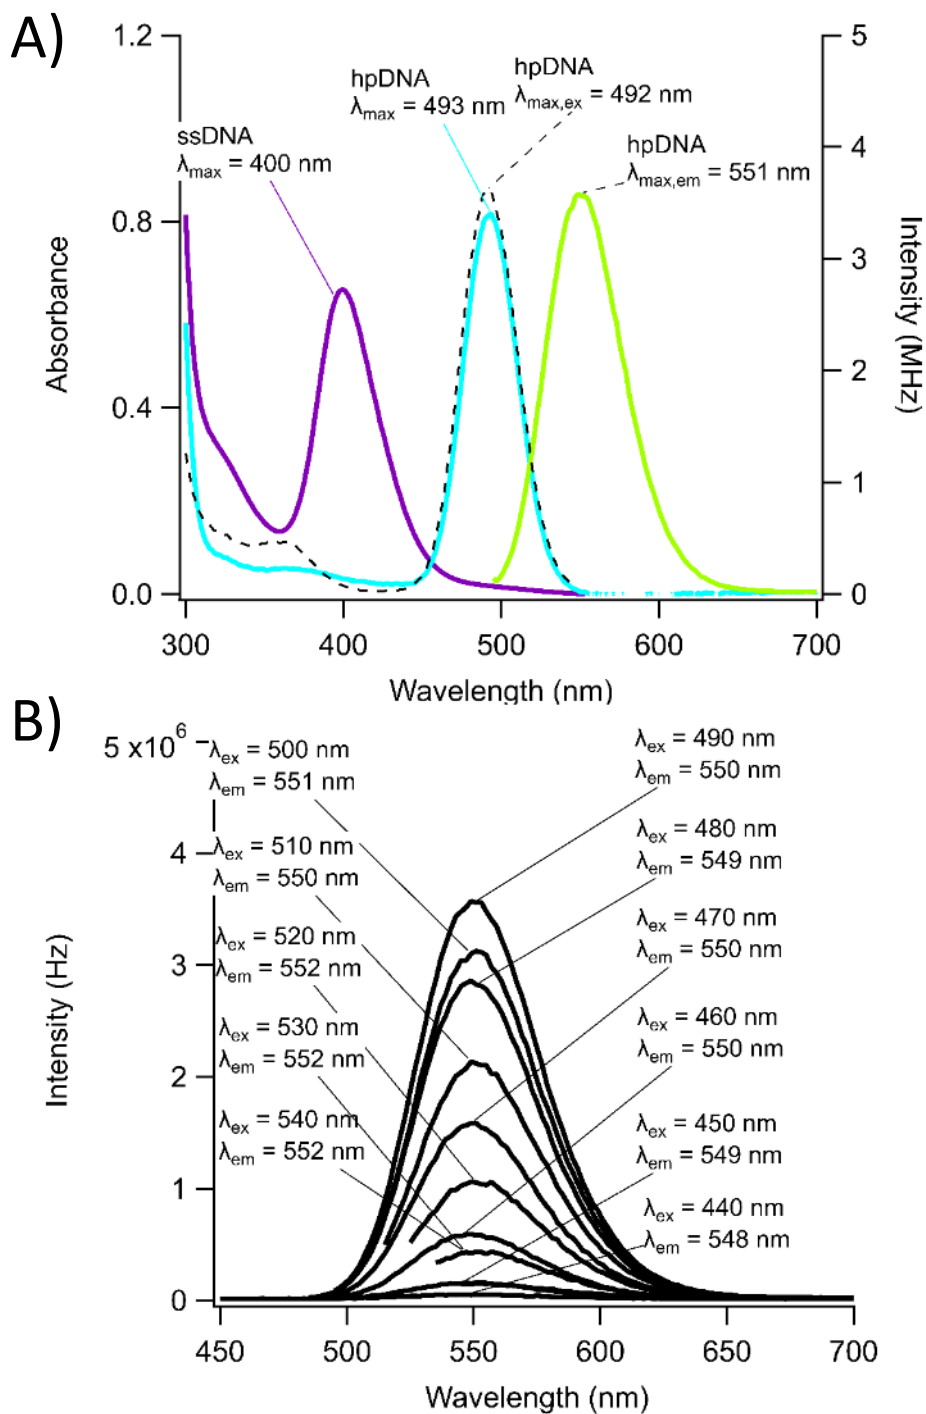

**Figure S1.** (A) Absorption spectra of the ssDNA-Ag<sub>10</sub> complexes (solid violet) and the hpDNA – Ag<sub>10</sub> complexes (solid blue). The excitation maximum and shape for the hpDNA-Ag<sub>10</sub> complex (dotted black) match the absorption transition. The emission band for the hpDNA-Ag<sub>10</sub> complex (solid green) has  $\lambda_{\max} = 550$  nm. (B) Emission spectra of hpDNA-Ag<sub>10</sub>. The emission band does not shift over the range of excitation wavelengths from 440 nm to 540 nm. These overlapping spectra support a single type of cluster. Adopted from Reference 41.

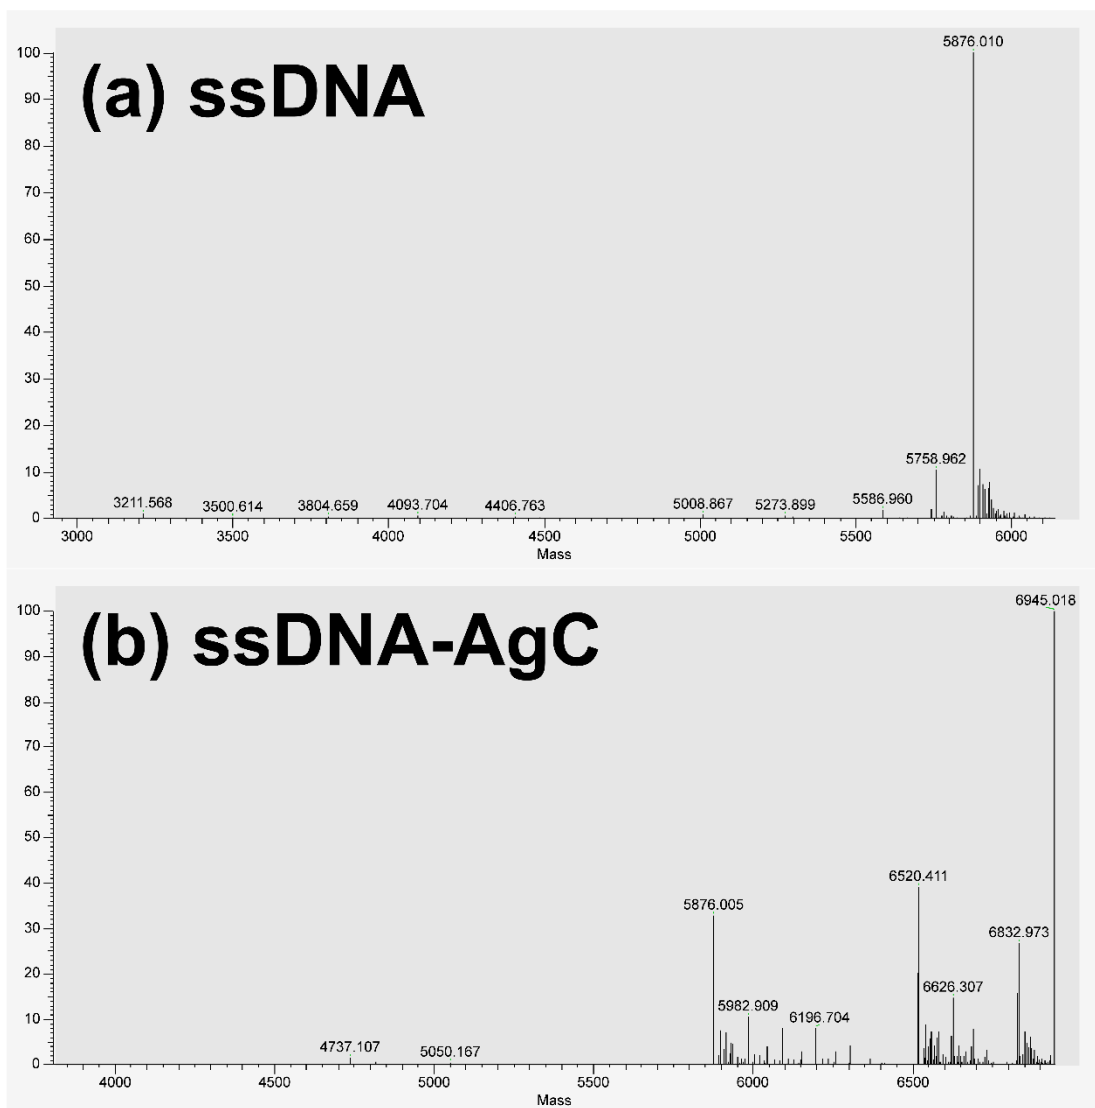

**Figure S2.** Negative-mode deconvoluted MS1 spectra of single stranded 20-mer oligonucleotide CCC CAA CTC CTT CCC GCC AC in 50 mM ammonium acetate **(a)** without and **(b)** with the AgC.

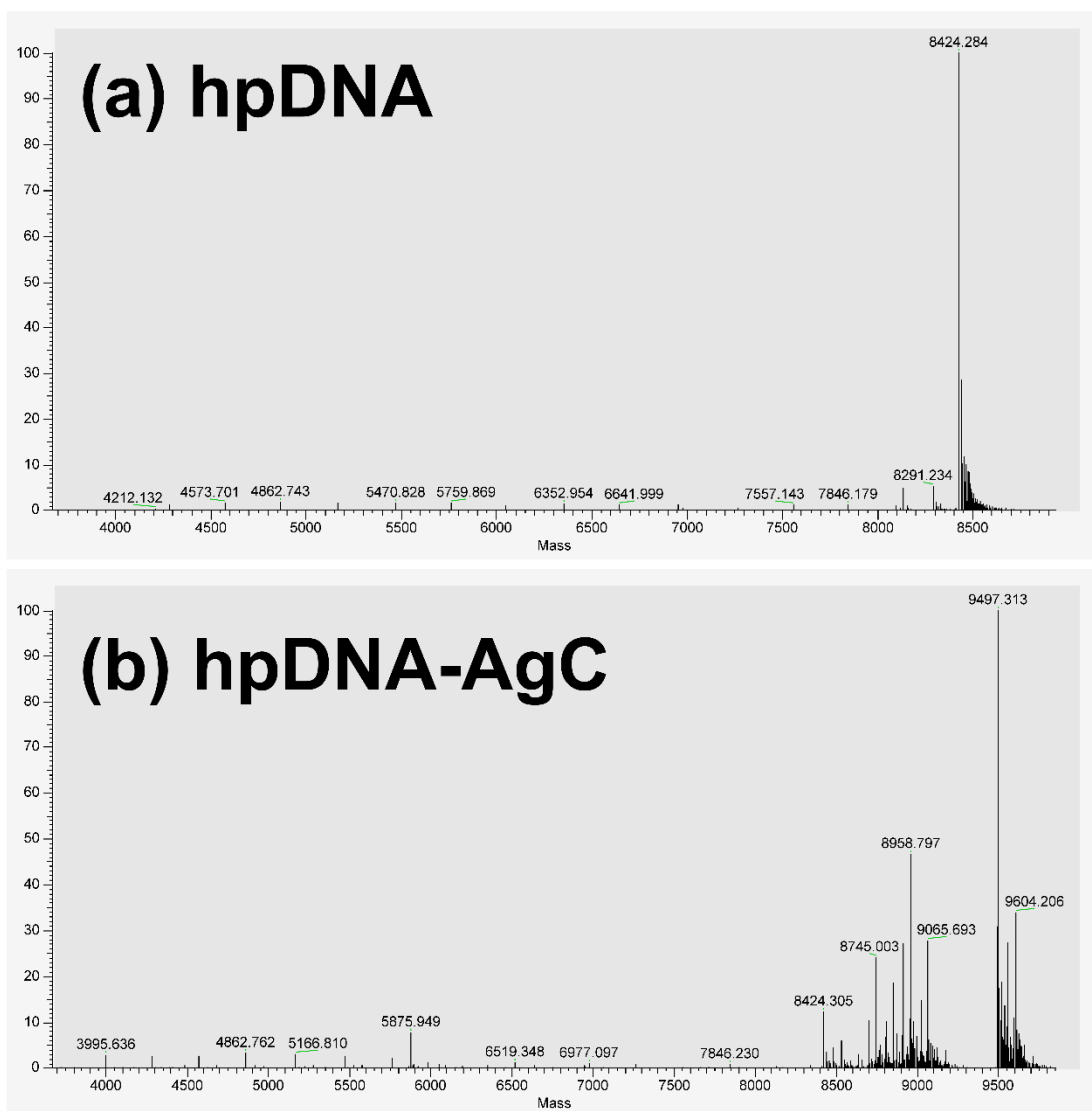

**Figure S3.** Negative-mode deconvoluted MS1 spectra of hairpin 28-mer oligonucleotide CCC CAA CTC CTT CCC GCC TTT TGG CGG G in 50 mM ammonium acetate **(a)** without and **(b)** with the Ag.



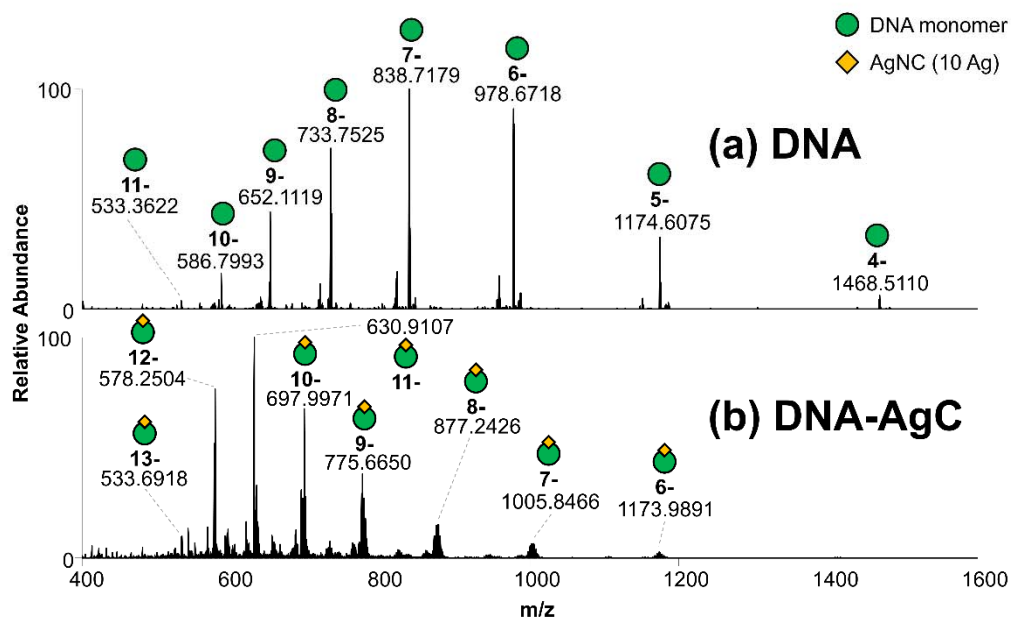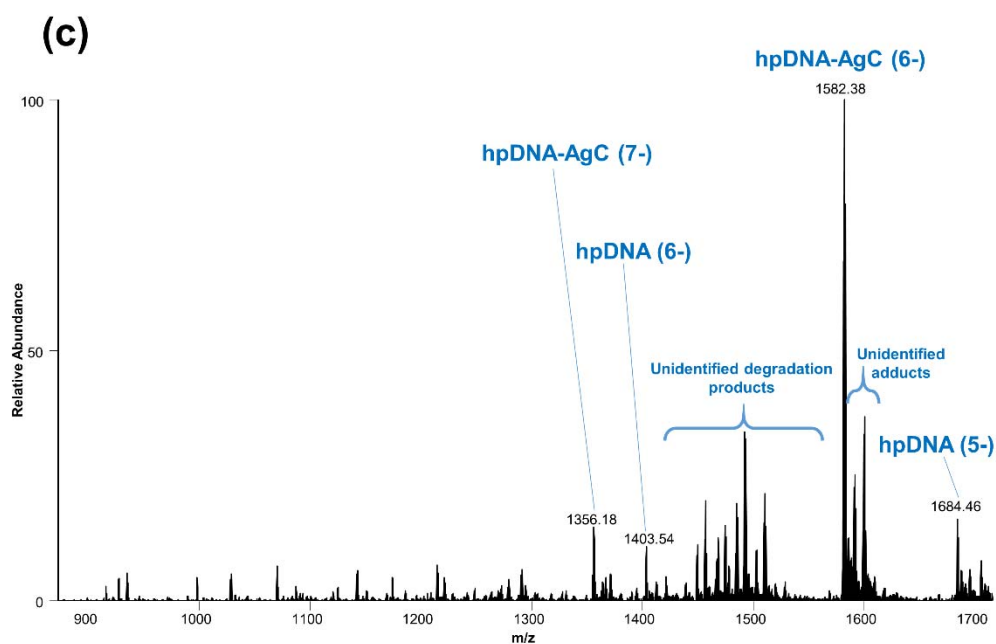

**Figure S4.** MS1 spectra of single stranded 20-mer oligonucleotide CCC CAA CTC CTT CCC GCC AC in 50:50 water:methanol (v/v) with 50 mM ammonium acetate **(a)** without and **(b)** with the AgC, highlighting the charge state shift observed for denaturing solvent compared to native solvent conditions (**Figure 1**), **(c)** assignment of contaminants in hpDNA-AgC MS1 spectrum (including bare hpDNA and unidentified degradation products).

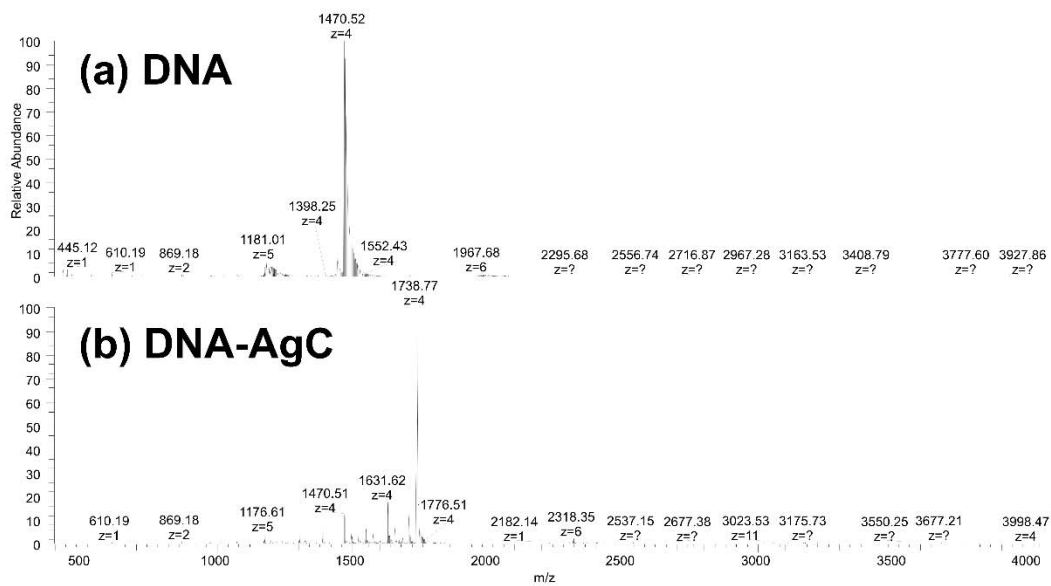

**Figure S5.** Positive-mode MS1 spectra of ssDNA CCC CAA CTC CTT CCC GCC AC **(a)** without and **(b)** with silver cluster.

**(a)**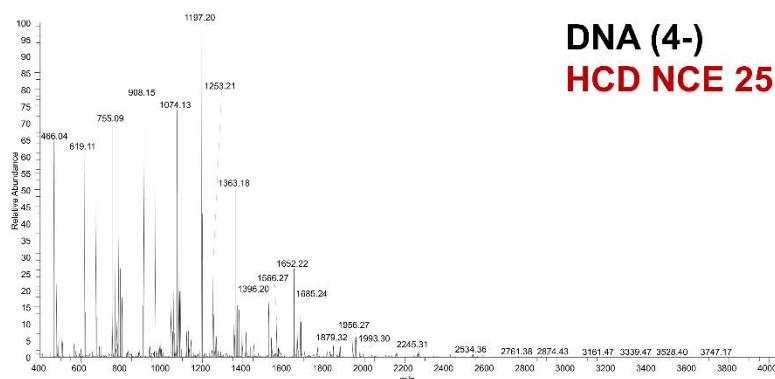**(b)**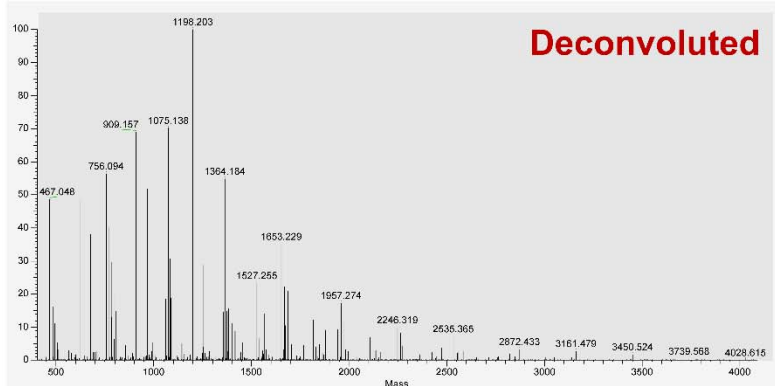**(c)**

| Ion | Type | Mass (Exp) | Mass (Theo) | ppm error |
|-----|------|------------|-------------|-----------|
| 3   |      | 676.127    | 676.128     | 1.5       |
| 4   |      | 965.173    | 965.174     | 1.0       |
| 5   |      | 1254.218   | 1254.220    | 1.6       |
| 6   |      | 1567.275   | 1567.277    | 1.3       |
| 7   | a-B  | 1880.331   | 1880.334    | 1.6       |
| 9   |      | 2473.422   | 2473.426    | 1.6       |
| 10  |      | 2762.467   | 2762.472    | 1.8       |
| 13  |      | 3659.603   | 3659.610    | 1.9       |
| 14  |      | 3948.647   | 3948.656    | 2.3       |
| 8   | z    | 2295.420   | 2295.414    | 2.6       |
| 3   |      | 829.192    | 829.193     | 1.2       |
| 4   | y    | 1118.237   | 1118.239    | 1.8       |
| 5   |      | 1447.289   | 1447.291    | 1.4       |
| 2   |      | 578.091    | 578.099     | 13.8      |
| 5   | c    | 1469.271   | 1469.248    | 15.7      |
| 2   |      | 596.101    | 596.103     | 3.4       |
| 3   | d    | 885.146    | 885.150     | 4.5       |
| 4   |      | 1174.191   | 1174.196    | 4.3       |
| 2   |      | 602.102    | 602.103     | 1.7       |
| 3   | x    | 891.147    | 891.150     | 3.4       |
| 5   |      | 1509.246   | 1509.249    | 2.0       |
| 2   |      | 620.112    | 620.113     | 1.6       |
| 3   |      | 909.157    | 909.159     | 2.2       |
| 4   |      | 1198.203   | 1198.205    | 1.7       |
| 5   |      | 1527.255   | 1527.257    | 1.3       |
| 6   | w    | 1816.300   | 1816.303    | 1.7       |
| 7   |      | 2105.346   | 2105.349    | 1.4       |
| 10  |      | 3002.482   | 3002.487    | 1.7       |
| 11  |      | 3291.527   | 3291.533    | 1.8       |
| 13  |      | 3884.610   | 3884.624    | 3.6       |

**Figure S6. (a)** HCD spectrum of 4- charge state ( $m/z$  1468) of single stranded 20-mer oligonucleotide CCC CAA CTC CTT CCC GCC AC, **(b)** deconvoluted spectrum and **(c)** tabulated sequence ion assignments and mass error values (ppm). The columns entitled Ion and Type indicate the assignment of the fragment ion:  $a_n$ -B,  $c_n$ ,  $d_n$ ,  $x_n$ ,  $y_n$ ,  $w_n$ ,  $z_n$ , in which the number n (listed in the Ion column) represents the number of nucleotides contained in the fragment. Ions are grouped by type.

**(a)**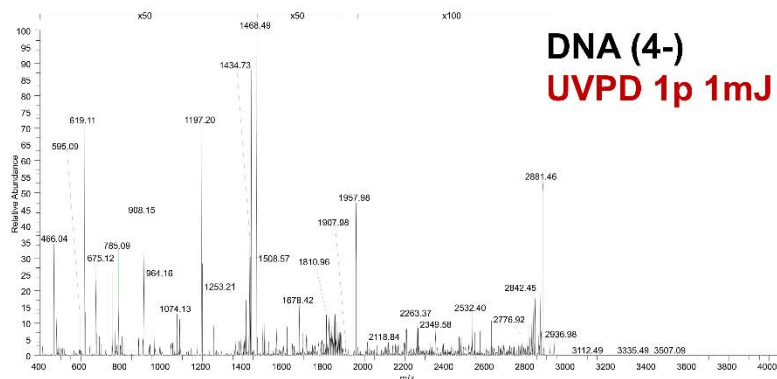**(b)**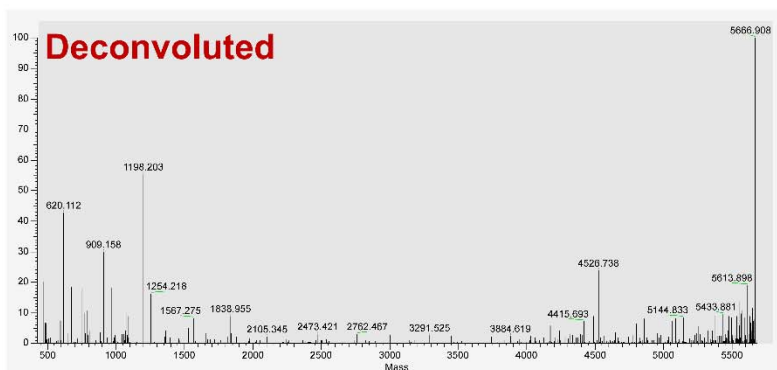**(c)**

| Ion | Type | Mass (Exp) | Mass (Theo) | ppm error |
|-----|------|------------|-------------|-----------|
| 3   |      | 676.127    | 676.128     | 1.5       |
| 4   |      | 965.172    | 965.174     | 2.1       |
| 5   |      | 1254.218   | 1254.220    | 1.6       |
| 6   |      | 1567.275   | 1567.277    | 1.3       |
| 7   |      | 1880.330   | 1880.334    | 2.1       |
| 9   |      | 2473.421   | 2473.426    | 2.0       |
| 10  | a-B  | 2762.467   | 2762.472    | 1.8       |
| 13  |      | 3659.603   | 3659.610    | 1.9       |
| 14  |      | 3948.648   | 3948.656    | 2.0       |
| 15  |      | 4237.697   | 4237.702    | 1.2       |
| 16  |      | 4526.738   | 4526.748    | 2.2       |
| 17  |      | 4855.792   | 4855.800    | 1.6       |
| 18  |      | 5144.833   | 5144.846    | 2.5       |
| 19  |      | 5433.881   | 5433.892    | 2.0       |
| 2   |      | 497.117    | 497.118     | 2.0       |
| 16  | a    | 4676.757   | 4676.795    | 8.1       |
| 17  |      | 4965.824   | 4965.841    | 3.4       |
| 18  |      | 5254.875   | 5254.888    | 2.5       |
| 19  |      | 5567.928   | 5567.945    | 3.1       |
| 2   |      | 521.128    | 521.129     | 1.9       |
| 18  | z    | 5278.890   | 5278.899    | 1.7       |
| 19  |      | 5567.945   | 5567.945    | 0.0       |
| 2   | c    | 578.091    | 578.099     | 13.8      |
| 2   |      | 596.101    | 596.103     | 3.4       |
| 3   | d    | 885.146    | 885.150     | 4.5       |
| 14  |      | 4157.669   | 4157.681    | 2.9       |
| 17  |      | 5064.805   | 5064.826    | 4.1       |
| 2   |      | 602.102    | 602.103     | 1.7       |
| 3   | x    | 891.147    | 891.150     | 3.4       |
| 18  |      | 5359.795   | 5359.873    | 14.6      |
| 2   |      | 620.112    | 620.113     | 1.6       |
| 3   |      | 909.158    | 909.159     | 1.1       |
| 4   |      | 1198.203   | 1198.205    | 1.7       |
| 5   |      | 1527.255   | 1527.257    | 1.3       |
| 6   |      | 1816.299   | 1816.303    | 2.2       |
| 7   |      | 2105.345   | 2105.349    | 1.9       |
| 8   |      | 2394.394   | 2394.395    | 0.4       |
| 10  | w    | 3002.479   | 3002.487    | 2.7       |
| 11  |      | 3291.525   | 3291.533    | 2.4       |
| 13  |      | 3884.619   | 3884.624    | 1.3       |
| 14  |      | 4173.664   | 4173.670    | 1.4       |
| 15  |      | 4486.716   | 4486.728    | 2.7       |
| 16  |      | 4799.777   | 4799.785    | 1.7       |
| 17  |      | 5088.820   | 5088.831    | 2.2       |
| 18  |      | 5377.864   | 5377.877    | 2.4       |
| 19  |      | 5666.908   | 5666.923    | 2.6       |

**Figure S7. (a)** UVPD spectrum of 4- charge state ( $m/z$  1468) of single stranded 20-mer oligonucleotide CCC CAA CTC CTT CCC GCC AC, **(b)** deconvoluted spectrum and **(c)** tabulated sequence ion assignments and mass error values (ppm). The columns entitled Ion and Type indicate the assignment of the fragment ion:  $a_n$ -B,  $c_n$ ,  $d_n$ ,  $x_n$ ,  $y_n$ ,  $w_n$ ,  $z_n$ , in which the number n (listed in the Ion column) represents the number of nucleotides contained in the fragment. Ions are grouped by type.

**(a)**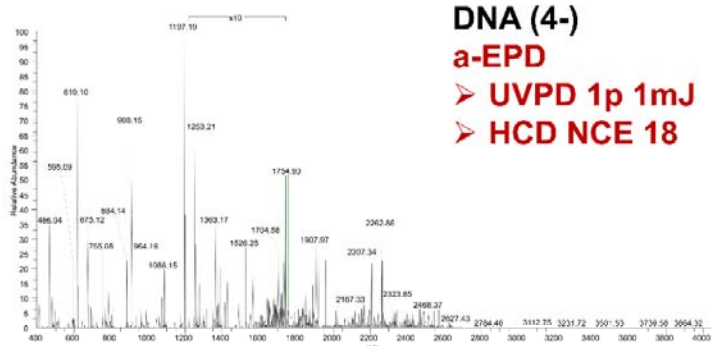**(b)**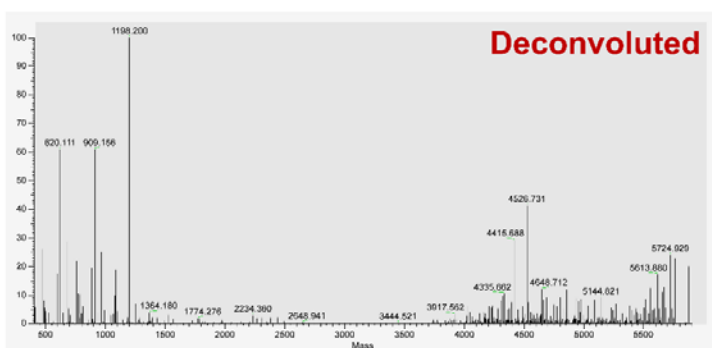**(c)**

| Ion | Type     | Mass (Exp) | Mass (Theo) | ppm error |     |
|-----|----------|------------|-------------|-----------|-----|
| 3   | a-B      | 676.126    | 676.128     | 3.0       |     |
| 4   |          | 965.170    | 965.174     | 4.1       |     |
| 5   |          | 1254.215   | 1254.220    | 4.0       |     |
| 6   |          | 1567.271   | 1567.277    | 3.8       |     |
| 15  |          | 4237.691   | 4237.702    | 2.6       |     |
| 16  |          | 4526.731   | 4526.748    | 3.8       |     |
| 17  |          | 4855.778   | 4855.800    | 4.5       |     |
| 18  |          | 5144.821   | 5144.846    | 4.9       |     |
| 2   |          | 497.116    | 497.118     | 4.0       |     |
| 3   | a        | 786.160    | 786.164     | 5.1       |     |
| 4   |          | 1075.205   | 1075.211    | 5.6       |     |
| 5   |          | 1388.261   | 1388.268    | 5.0       |     |
| 14  |          | 4058.635   | 4058.696    | 15.0      |     |
| 15  |          | 4347.690   | 4347.742    | 12.0      |     |
| 16  |          | 4676.758   | 4676.795    | 7.9       |     |
| 17  |          | 4965.800   | 4965.841    | 8.3       |     |
| 19  |          | 5567.915   | 5567.945    | 5.4       |     |
| 2   |          | 521.127    | 521.129     | 3.8       |     |
| 3   | z        | 810.172    | 810.176     | 4.9       |     |
| 4   |          | 1099.216   | 1099.222    | 5.5       |     |
| 5   |          | 1428.267   | 1428.275    | 5.6       |     |
| 16  |          | 4700.761   | 4700.806    | 9.6       |     |
| 19  |          | 5567.915   | 5567.945    | 5.4       |     |
| 4   |          | y          | 1118.234    | 1118.239  | 4.5 |
| 17  |          |            | 5046.815    | 5046.817  | 0.4 |
| 2   |          |            | 596.100     | 596.103   | 5.0 |
| 3   |          | d          | 885.145     | 885.150   | 5.6 |
| 4   | 1174.189 |            | 1174.196    | 6.0       |     |
| 5   | 1487.246 |            | 1487.254    | 5.4       |     |
| 13  | 3868.615 |            | 3868.635    | 5.2       |     |
| 14  | 4157.664 |            | 4157.681    | 4.1       |     |
| 15  | 4446.713 |            | 4446.728    | 3.4       |     |
| 16  | 4775.759 |            | 4775.780    | 4.4       |     |
| 18  | 5353.868 |            | 5353.873    | 0.9       |     |
| 19  | 5666.892 |            | 5666.930    | 6.7       |     |
| 3   | x        | 891.145    | 891.150     | 5.6       |     |
| 4   |          | 1180.190   | 1180.196    | 5.1       |     |
| 5   |          | 1509.242   | 1509.249    | 4.6       |     |
| 17  |          | 5070.806   | 5070.826    | 3.9       |     |
| 2   |          | w          | 620.111     | 620.113   | 3.2 |
| 3   |          |            | 909.156     | 909.159   | 3.3 |
| 4   |          |            | 1198.200    | 1198.205  | 4.2 |
| 5   |          |            | 1527.252    | 1527.257  | 3.3 |
| 13  |          |            | 3884.612    | 3884.624  | 3.1 |
| 14  | 4173.656 |            | 4173.670    | 3.4       |     |
| 15  | 4486.714 |            | 4486.728    | 3.1       |     |
| 16  | 4799.765 |            | 4799.785    | 4.2       |     |
| 17  | 5088.806 |            | 5088.831    | 4.9       |     |
| 18  | 5377.856 | 5377.877   | 3.9         |           |     |
| 19  | 5666.892 | 5666.923   | 5.5         |           |     |

**Figure S8.** (a) a-EPD spectrum of 4- charge state (UVPD of 4- of  $m/z$  1468, HCD of subsequent 3•- of  $m/z$  1957) of single stranded 20-mer oligonucleotide CCC CAA CTC CTT CCC GCC AC, (b) deconvoluted spectrum and (c) tabulated sequence ion assignments and mass error values (ppm). The columns entitled Ion and Type indicate the assignment of the fragment ion:  $a_n$ -B,  $c_n$ ,  $d_n$ ,  $x_n$ ,  $y_n$ ,  $w_n$ ,  $z_n$ , in which the number n (listed in the Ion column) represents the number of nucleotides contained in the fragment. Ions are grouped by type.

**(a)**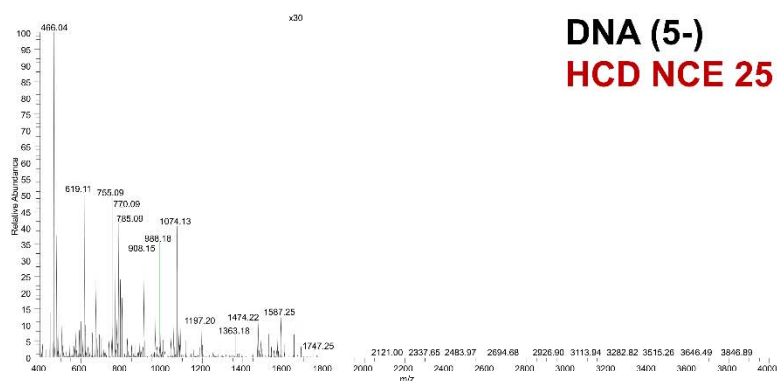**(b)**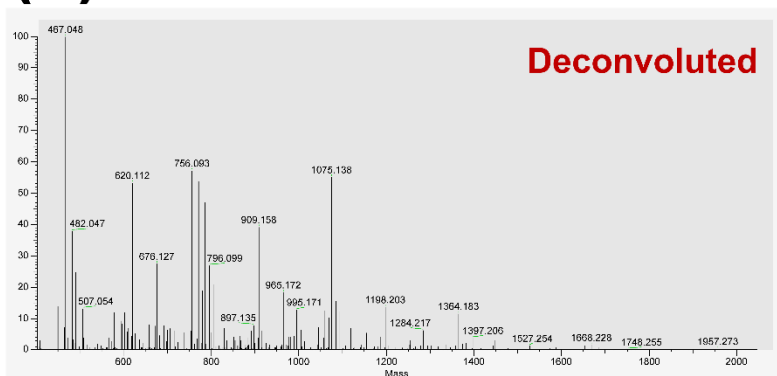**(c)**

| Ion | Type | Mass (Exp) | Mass (Theo) | ppm error |
|-----|------|------------|-------------|-----------|
| 3   |      | 676.127    | 676.128     | 1.5       |
| 4   | a-B  | 965.172    | 965.174     | 2.1       |
| 5   |      | 1254.218   | 1254.220    | 1.6       |
| 6   |      | 1567.274   | 1567.277    | 1.9       |
| 3   | b    | 802.170    | 802.160     | 12.5      |
| 4   |      | 1091.214   | 1091.206    | 7.3       |
| 6   |      | 1717.328   | 1717.321    | 4.1       |
| 2   | y    | 540.146    | 540.147     | 1.9       |
| 3   |      | 829.192    | 829.193     | 1.2       |
| 4   |      | 1118.237   | 1118.239    | 1.8       |
| 5   | c    | 1447.289   | 1447.291    | 1.4       |
| 6   |      | 1736.330   | 1736.337    | 4.0       |
| 2   |      | 578.091    | 578.099     | 13.8      |
| 3   | d    | 867.136    | 867.145     | 10.4      |
| 2   |      | 596.101    | 596.103     | 3.4       |
| 3   |      | 885.146    | 885.150     | 4.5       |
| 2   | x    | 602.102    | 602.103     | 1.7       |
| 3   |      | 891.147    | 891.150     | 3.4       |
| 4   |      | 1180.192   | 1180.196    | 3.4       |
| 5   | w    | 1509.246   | 1509.249    | 2.0       |
| 2   |      | 620.112    | 620.113     | 1.6       |
| 3   |      | 909.158    | 909.159     | 1.1       |
| 4   |      | 1198.203   | 1198.205    | 1.7       |
| 5   |      | 1527.254   | 1527.257    | 2.0       |

**Figure S9. (a)** HCD spectrum of 5- charge state ( $m/z$  1174) of single stranded 20-mer oligonucleotide CCC CAA CTC CTT CCC GCC AC, **(b)** deconvoluted spectrum and **(c)** tabulated sequence ion assignments and mass error values (ppm). The columns entitled Ion and Type indicate the assignment of the fragment ion:  $a_n$ -B,  $c_n$ ,  $d_n$ ,  $x_n$ ,  $y_n$ ,  $w_n$ ,  $z_n$ , in which the number n (listed in the Ion column) represents the number of nucleotides contained in the fragment. Ions are grouped by type.



**(a)**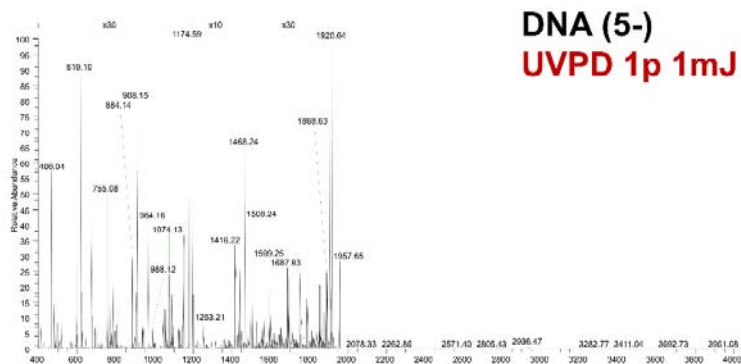**(b)**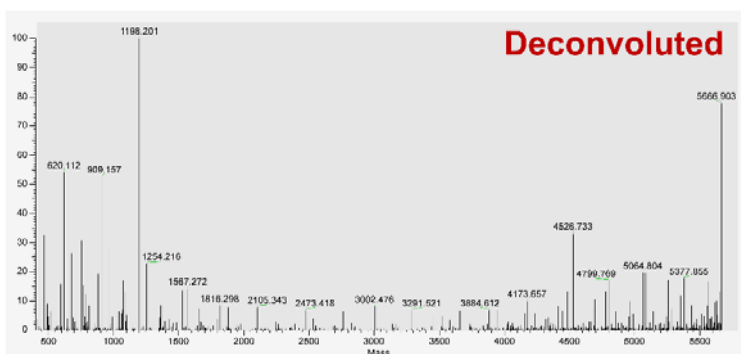**(c)**

| Ion | Type | Mass (Exp) | Mass (Theo) | ppm error |
|-----|------|------------|-------------|-----------|
| 3   |      | 676.126    | 676.128     | 3.0       |
| 4   |      | 965.174    | 965.174     | 0.0       |
| 5   |      | 1254.216   | 1254.220    | 3.2       |
| 6   |      | 1567.272   | 1567.277    | 3.2       |
| 7   |      | 1880.329   | 1880.334    | 2.7       |
| 8   |      | 2169.374   | 2169.380    | 2.8       |
| 9   |      | 2473.418   | 2473.426    | 3.2       |
| 10  |      | 2762.464   | 2762.472    | 2.9       |
| 11  | a-B  | 3051.509   | 3051.518    | 2.9       |
| 13  |      | 3659.587   | 3659.610    | 3.6       |
| 14  |      | 3948.643   | 3948.656    | 3.3       |
| 15  |      | 4237.691   | 4237.702    | 2.6       |
| 16  |      | 4526.733   | 4526.748    | 3.3       |
| 17  |      | 4855.780   | 4855.800    | 4.1       |
| 18  |      | 5144.824   | 5144.846    | 4.3       |
| 19  |      | 5433.872   | 5433.892    | 3.7       |
| 2   |      | 497.116    | 497.118     | 4.0       |
| 4   |      | 1075.211   | 1075.211    | 0.0       |
| 6   |      | 1701.319   | 1701.326    | 4.1       |
| 8   |      | 2294.411   | 2294.418    | 3.1       |
| 9   |      | 2583.450   | 2583.465    | 5.8       |
| 11  |      | 3176.540   | 3176.557    | 5.4       |
| 14  | a    | 4058.675   | 4058.696    | 5.2       |
| 15  |      | 4347.729   | 4347.742    | 3.0       |
| 16  |      | 4676.773   | 4676.795    | 4.7       |
| 17  |      | 4965.820   | 4965.841    | 4.2       |
| 18  |      | 5254.865   | 5254.888    | 4.4       |
| 19  |      | 5567.919   | 5567.945    | 4.7       |
| 4   |      | 1091.206   | 1091.206    | 0.0       |
| 6   |      | 1717.313   | 1717.321    | 4.7       |
| 9   | b    | 2599.449   | 2599.460    | 4.2       |
| 16  |      | 4682.777   | 4682.790    | 2.8       |
| 19  |      | 5583.911   | 5583.940    | 5.2       |
| 2   |      | 521.127    | 521.129     | 3.8       |
| 3   |      | 810.172    | 810.176     | 4.9       |
| 4   |      | 1099.222   | 1099.222    | 0.0       |
| 5   |      | 1428.269   | 1428.275    | 4.2       |
| 6   |      | 1717.313   | 1717.321    | 4.7       |
| 9   |      | 2599.449   | 2599.460    | 4.2       |
| 15  |      | 4387.722   | 4387.749    | 6.2       |
| 17  |      | 4989.831   | 4989.852    | 4.2       |
| 18  |      | 5278.876   | 5278.899    | 4.4       |
| 19  |      | 5567.919   | 5567.945    | 4.7       |
| 4   | y    | 1118.239   | 1118.239    | 0.0       |
| 2   |      | 578.090    | 578.099     | 15.8      |
| 3   | c    | 867.135    | 867.145     | 11.5      |
| 2   |      | 586.101    | 586.103     | 3.4       |
| 3   |      | 885.145    | 885.150     | 5.6       |
| 4   |      | 1174.196   | 1174.196    | 0.0       |
| 5   |      | 1487.246   | 1487.254    | 5.4       |
| 6   |      | 1800.302   | 1800.311    | 5.0       |
| 7   |      | 2089.348   | 2089.358    | 4.8       |
| 9   |      | 2682.445   | 2682.450    | 1.9       |
| 10  |      | 2971.483   | 2971.496    | 4.4       |
| 13  | d    | 3868.620   | 3868.635    | 3.9       |
| 14  |      | 4157.664   | 4157.681    | 4.1       |
| 15  |      | 4446.705   | 4446.728    | 5.2       |
| 16  |      | 4775.758   | 4775.780    | 4.6       |
| 17  |      | 5064.804   | 5064.826    | 4.3       |
| 18  |      | 5353.850   | 5353.873    | 4.3       |
| 19  |      | 5666.903   | 5666.930    | 4.8       |
| 2   | x    | 602.101    | 602.103     | 3.3       |
| 3   |      | 891.146    | 891.150     | 4.5       |
| 2   |      | 620.112    | 620.113     | 1.6       |
| 3   |      | 909.157    | 909.159     | 2.2       |
| 4   |      | 1198.205   | 1198.205    | 0.0       |
| 5   |      | 1527.253   | 1527.257    | 2.6       |
| 6   |      | 1816.298   | 1816.303    | 2.8       |
| 7   |      | 2105.343   | 2105.349    | 2.8       |
| 8   |      | 2394.389   | 2394.395    | 2.5       |
| 9   |      | 2698.431   | 2698.441    | 3.7       |
| 10  |      | 3002.476   | 3002.487    | 3.7       |
| 11  | w    | 3291.521   | 3291.533    | 3.6       |
| 12  |      | 3580.572   | 3580.579    | 2.0       |
| 13  |      | 3884.612   | 3884.624    | 3.1       |
| 14  |      | 4173.657   | 4173.670    | 3.1       |
| 15  |      | 4486.711   | 4486.728    | 3.8       |
| 16  |      | 4799.769   | 4799.785    | 3.3       |
| 17  |      | 5088.812   | 5088.831    | 3.7       |
| 18  |      | 5377.855   | 5377.877    | 4.1       |
| 19  |      | 5666.903   | 5666.923    | 3.5       |

**Figure S10.** (a) UVPD spectrum of 5- charge state ( $m/z$  1174) of single stranded 20-mer oligonucleotide CCC CAA CTC CTT CCC GCC AC, (b) deconvoluted spectrum and (c) tabulated sequence ion assignments and mass error values (ppm).

**(a)**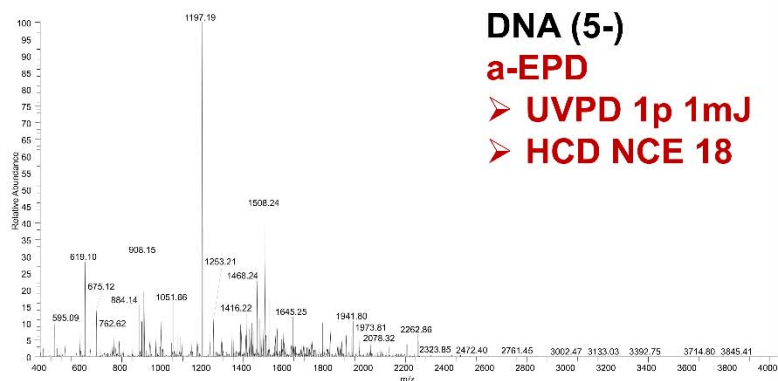**(b)**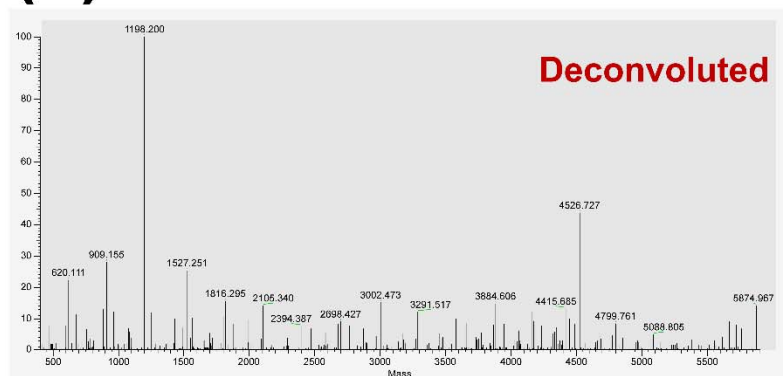**(c)**

| Ion | Type | Mass (Exp) | Mass (Theo) | ppm error |
|-----|------|------------|-------------|-----------|
| 3   |      | 676.125    | 676.128     | 4.4       |
| 4   |      | 965.170    | 965.174     | 4.1       |
| 5   |      | 1254.215   | 1254.220    | 4.0       |
| 6   |      | 1567.271   | 1567.277    | 3.8       |
| 7   |      | 1880.326   | 1880.334    | 4.3       |
| 8   |      | 2169.369   | 2169.380    | 5.1       |
| 9   |      | 2473.414   | 2473.426    | 4.9       |
| 10  |      | 2762.459   | 2762.472    | 4.7       |
| 11  |      | 3051.504   | 3051.518    | 4.6       |
| 12  |      | 3355.547   | 3355.564    | 5.1       |
| 13  |      | 3659.594   | 3659.610    | 4.4       |
| 14  |      | 3948.638   | 3948.656    | 4.6       |
| 15  |      | 4237.682   | 4237.702    | 4.7       |
| 16  |      | 4526.727   | 4526.748    | 4.6       |
| 19  |      | 5433.867   | 5433.892    | 4.6       |
| 2   |      | 497.116    | 497.118     | 4.0       |
| 3   |      | 786.160    | 786.164     | 5.1       |
| 4   |      | 1075.204   | 1075.211    | 6.5       |
| 6   |      | 1701.316   | 1701.326    | 5.9       |
| 7   |      | 1990.360   | 1990.372    | 6.0       |
| 8   |      | 2294.404   | 2294.418    | 6.1       |
| 9   |      | 2583.449   | 2583.465    | 6.2       |
| 10  |      | 2872.497   | 2872.511    | 4.9       |
| 11  |      | 3176.540   | 3176.557    | 5.4       |
| 13  |      | 3769.629   | 3769.650    | 5.6       |
| 14  |      | 4058.675   | 4058.696    | 5.2       |
| 15  |      | 4347.720   | 4347.742    | 5.1       |
| 16  |      | 4676.769   | 4676.795    | 5.6       |
| 17  |      | 4965.810   | 4965.841    | 6.2       |
| 18  |      | 5254.858   | 5254.888    | 5.7       |
| 19  |      | 5567.913   | 5567.945    | 5.7       |
| 6   |      | 1717.311   | 1717.321    | 5.8       |
| 7   |      | 2006.355   | 2006.367    | 6.0       |
| 9   |      | 2599.444   | 2599.460    | 6.2       |
| 11  |      | 3192.532   | 3192.552    | 6.3       |
| 13  |      | 3785.625   | 3785.645    | 5.3       |
| 14  |      | 4074.667   | 4074.691    | 5.9       |
| 2   |      | 521.127    | 521.129     | 3.8       |
| 3   |      | 810.171    | 810.176     | 6.2       |
| 4   |      | 1099.215   | 1099.222    | 6.4       |
| 5   |      | 1428.267   | 1428.275    | 5.6       |
| 6   |      | 1717.311   | 1717.321    | 5.8       |
| 7   |      | 2006.355   | 2006.367    | 6.0       |
| 8   |      | 2295.406   | 2295.414    | 3.5       |
| 9   |      | 2599.444   | 2599.460    | 6.2       |
| 10  |      | 2903.489   | 2903.506    | 5.9       |
| 11  |      | 3192.532   | 3192.552    | 6.3       |
| 12  |      | 3481.585   | 3481.598    | 3.7       |
| 13  |      | 3785.625   | 3785.645    | 5.3       |
| 14  |      | 4074.667   | 4074.691    | 5.9       |
| 15  |      | 4387.727   | 4387.749    | 5.0       |
| 17  |      | 4969.820   | 4969.852    | 6.4       |
| 18  |      | 5278.865   | 5278.899    | 6.4       |
| 19  |      | 5567.913   | 5567.945    | 5.7       |
| 4   |      | 1156.178   | 1156.191    | 11.2      |
| 7   |      | 2071.334   | 2071.352    | 8.7       |
| 8   |      | 2375.374   | 2375.397    | 9.7       |
| 10  |      | 2953.469   | 2953.489    | 6.8       |
| 11  |      | 3257.516   | 3257.535    | 5.8       |
| 13  |      | 3850.597   | 3850.627    | 7.8       |
| 16  |      | 4757.746   | 4757.771    | 5.3       |
| 17  |      | 5046.801   | 5046.817    | 3.2       |
| 2   |      | 596.100    | 596.103     | 5.0       |
| 3   |      | 885.144    | 885.150     | 6.8       |
| 4   |      | 1174.189   | 1174.196    | 6.0       |
| 5   |      | 1487.245   | 1487.254    | 6.1       |
| 6   |      | 1800.300   | 1800.311    | 6.1       |
| 7   |      | 2089.343   | 2089.358    | 7.2       |
| 9   |      | 2682.436   | 2682.450    | 5.2       |
| 10  |      | 2971.479   | 2971.496    | 5.7       |
| 11  |      | 3275.522   | 3275.542    | 6.1       |
| 12  |      | 3579.564   | 3579.588    | 6.7       |
| 13  |      | 3868.612   | 3868.635    | 5.9       |
| 14  |      | 4157.656   | 4157.681    | 6.0       |
| 15  |      | 4446.701   | 4446.728    | 6.1       |
| 16  |      | 4775.752   | 4775.780    | 5.9       |
| 17  |      | 5064.799   | 5064.826    | 5.3       |
| 2   |      | 602.101    | 602.103     | 3.3       |
| 3   |      | 891.144    | 891.150     | 6.7       |
| 5   |      | 1509.240   | 1509.249    | 6.0       |
| 6   |      | 1798.286   | 1798.295    | 5.0       |
| 7   |      | 2087.329   | 2087.341    | 5.7       |
| 15  |      | 4468.695   | 4468.722    | 6.0       |
| 17  |      | 5070.800   | 5070.826    | 5.1       |
| 2   |      | 620.111    | 620.113     | 3.2       |
| 3   |      | 909.155    | 909.159     | 4.4       |
| 4   |      | 1198.200   | 1198.205    | 4.2       |
| 5   |      | 1527.251   | 1527.257    | 3.9       |
| 6   |      | 1816.295   | 1816.303    | 4.4       |
| 7   |      | 2105.340   | 2105.349    | 4.3       |
| 8   |      | 2394.387   | 2394.395    | 3.3       |
| 9   |      | 2698.427   | 2698.441    | 5.2       |
| 10  |      | 3002.473   | 3002.487    | 4.7       |
| 11  |      | 3291.517   | 3291.533    | 4.9       |
| 12  |      | 3580.567   | 3580.579    | 3.4       |
| 13  |      | 3884.606   | 3884.624    | 4.6       |
| 14  |      | 4173.650   | 4173.670    | 4.8       |
| 15  |      | 4486.706   | 4486.728    | 4.9       |
| 16  |      | 4799.761   | 4799.785    | 5.0       |
| 17  |      | 5088.805   | 5088.831    | 5.1       |
| 18  |      | 5377.849   | 5377.877    | 5.2       |
| 19  |      | 5666.895   | 5666.923    | 4.9       |

**Figure S11. (a)** a-EPD spectrum of 5- charge state (UVPD of 5- of  $m/z$  1174, HCD of subsequent 4•- of  $m/z$  1468) of single stranded 20-mer oligonucleotide CCC CAA CTC CTT CCC GCC AC, **(b)** deconvoluted spectrum and **(c)** tabulated sequence ion assignments and mass error values (ppm).



**(a)**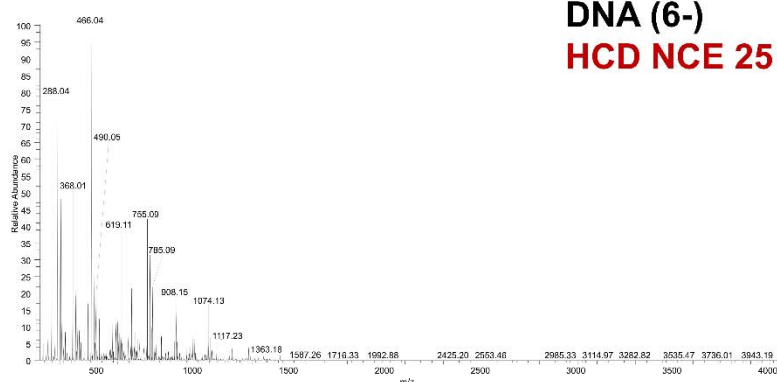

**DNA (6-)**  
**HCD NCE 25**

**(b)**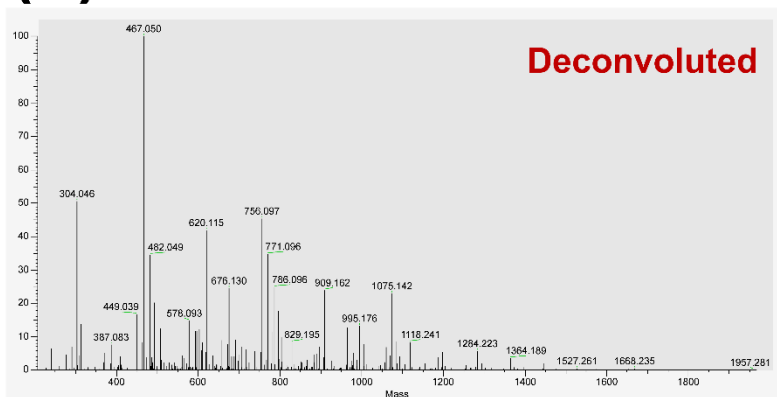

**Deconvoluted**

**(c)**

| Ion | Type | Mass (Exp) | Mass (Theo) | ppm error |
|-----|------|------------|-------------|-----------|
| 2   |      | 387.083    | 387.082     | 2.6       |
| 3   |      | 676.130    | 676.128     | 3.0       |
| 4   | a-B  | 965.177    | 965.174     | 3.1       |
| 5   |      | 1254.223   | 1254.220    | 2.4       |
| 6   |      | 1567.280   | 1567.277    | 1.9       |
| 3   | b    | 802.173    | 802.160     | 16.2      |
| 4   |      | 1091.219   | 1091.206    | 11.9      |
| 6   |      | 1717.336   | 1717.321    | 8.7       |
| 2   |      | 540.149    | 540.147     | 3.7       |
| 3   | y    | 829.195    | 829.193     | 2.4       |
| 4   |      | 1118.241   | 1118.239    | 1.8       |
| 5   |      | 1447.295   | 1447.291    | 2.8       |
| 6   |      | 1736.339   | 1736.337    | 1.2       |
| 2   |      | 578.093    | 578.099     | 10.4      |
| 3   | c    | 867.140    | 867.145     | 5.8       |
| 4   |      | 1156.186   | 1156.191    | 4.3       |
| 5   |      | 1469.276   | 1469.248    | 19.1      |
| 2   | d    | 596.104    | 596.103     | 1.7       |
| 3   |      | 885.150    | 885.150     | 0.0       |
| 2   |      | 602.104    | 602.103     | 1.7       |
| 3   | x    | 891.151    | 891.150     | 1.1       |
| 4   |      | 1180.197   | 1180.196    | 0.8       |
| 5   |      | 1509.248   | 1509.249    | 0.7       |
| 2   |      | 620.115    | 620.113     | 3.2       |
| 3   | w    | 909.162    | 909.159     | 3.3       |
| 4   |      | 1198.208   | 1198.205    | 2.5       |
| 5   |      | 1527.261   | 1527.257    | 2.6       |

**Figure S12. (a)** HCD spectrum of 6- charge state ( $m/z$  978) of single stranded 20-mer oligonucleotide CCC CAA CTC CTT CCC GCC AC, **(b)** deconvoluted spectrum and **(c)** tabulated sequence ion assignments and mass error values (ppm). The columns entitled Ion and Type indicate the assignment of the fragment ion:  $a_n$ -B,  $c_n$ ,  $d_n$ ,  $x_n$ ,  $y_n$ ,  $w_n$ ,  $z_n$ , in which the number  $n$  (listed in the Ion column) represents the number of nucleotides contained in the fragment. Ions are grouped by type.

**(a)**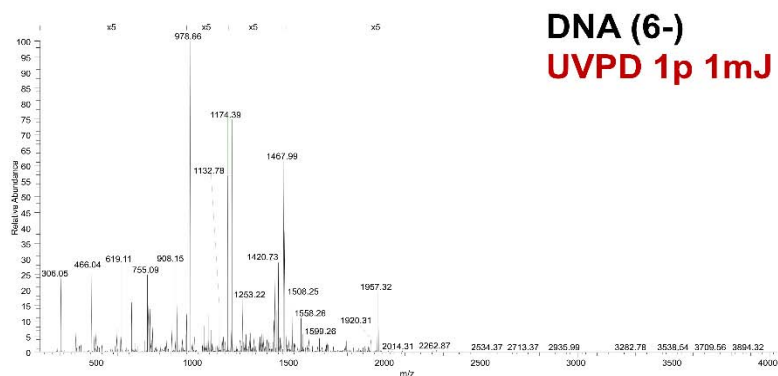**(b)**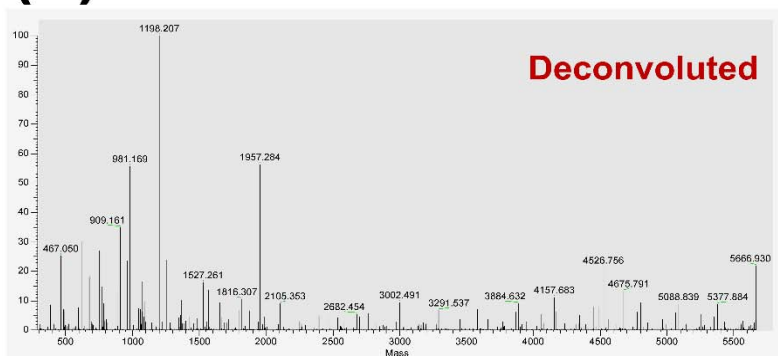**(c)**

| Ion | Type | Mass (Exp) | Mass (Theo) | ppm error |
|-----|------|------------|-------------|-----------|
| 2   |      | 387.083    | 387.082     | 2.6       |
| 3   |      | 676.130    | 676.128     | 3.0       |
| 4   |      | 965.177    | 965.174     | 3.1       |
| 5   |      | 1254.223   | 1254.220    | 2.4       |
| 6   |      | 1567.281   | 1567.277    | 2.6       |
| 7   |      | 1880.339   | 1880.334    | 2.7       |
| 8   |      | 2169.385   | 2169.380    | 2.3       |
| 9   |      | 2473.431   | 2473.426    | 2.0       |
| 10  |      | 2762.478   | 2762.472    | 2.2       |
| 11  | a-B  | 3051.523   | 3051.518    | 1.6       |
| 12  |      | 3355.568   | 3355.564    | 1.2       |
| 13  |      | 3659.617   | 3659.610    | 1.9       |
| 14  |      | 3948.662   | 3948.656    | 1.5       |
| 15  |      | 4237.711   | 4237.702    | 2.1       |
| 16  |      | 4526.748   | 4526.748    | 0.0       |
| 18  |      | 5144.854   | 5144.846    | 1.6       |
| 19  |      | 5433.902   | 5433.892    | 1.8       |
| 2   |      | 497.119    | 497.118     | 2.0       |
| 4   |      | 1075.211   | 1075.211    | 0.0       |
| 5   |      | 1388.269   | 1388.268    | 0.7       |
| 6   |      | 1701.327   | 1701.326    | 0.6       |
| 7   |      | 1990.373   | 1990.372    | 0.5       |
| 8   |      | 2294.419   | 2294.418    | 0.4       |
| 9   |      | 2583.466   | 2583.465    | 0.4       |
| 11  | a    | 3176.558   | 3176.557    | 0.3       |
| 13  |      | 3769.652   | 3769.650    | 0.5       |
| 14  |      | 4058.699   | 4058.696    | 0.7       |
| 15  |      | 4347.749   | 4347.742    | 1.6       |
| 16  |      | 4676.795   | 4676.795    | 0.0       |
| 17  |      | 4965.844   | 4965.841    | 0.6       |
| 18  |      | 5254.894   | 5254.888    | 1.1       |
| 19  |      | 5567.950   | 5567.945    | 0.9       |
| 2   |      | 521.130    | 521.129     | 1.9       |
| 3   |      | 810.177    | 810.176     | 1.2       |
| 4   |      | 1099.223   | 1099.222    | 0.9       |
| 5   |      | 1428.276   | 1428.275    | 0.7       |
| 6   |      | 1717.322   | 1717.321    | 0.6       |
| 7   |      | 2006.368   | 2006.367    | 0.5       |
| 8   |      | 2295.421   | 2295.414    | 3.0       |
| 9   |      | 2599.462   | 2599.460    | 0.8       |
| 10  |      | 2903.508   | 2903.506    | 0.7       |
| 11  | z    | 3192.553   | 3192.552    | 0.3       |
| 12  |      | 3481.606   | 3481.598    | 2.3       |
| 13  |      | 3785.647   | 3785.645    | 0.5       |
| 14  |      | 4074.689   | 4074.691    | 0.5       |
| 15  |      | 4387.753   | 4387.749    | 0.9       |
| 16  |      | 4700.806   | 4700.806    | 0.0       |
| 17  |      | 4989.854   | 4989.852    | 0.4       |
| 18  |      | 5278.900   | 5278.899    | 0.2       |
| 19  |      | 5567.950   | 5567.945    | 0.9       |
| 8   |      | 2314.429   | 2314.429    | 0.0       |
| 10  | y    | 2922.524   | 2922.521    | 1.0       |
| 16  |      | 4719.819   | 4719.819    | 0.0       |
| 2   |      | 578.093    | 578.099     | 10.4      |
| 14  | c    | 4139.673   | 4139.673    | 0.0       |
| 16  |      | 4757.771   | 4757.771    | 0.0       |
| 2   |      | 596.104    | 596.103     | 1.7       |
| 3   |      | 885.150    | 885.150     | 0.0       |
| 4   |      | 1174.197   | 1174.196    | 0.9       |
| 5   |      | 1487.254   | 1487.254    | 0.0       |
| 6   |      | 1800.313   | 1800.311    | 1.1       |
| 7   |      | 2089.358   | 2089.358    | 0.0       |
| 9   |      | 2682.454   | 2682.450    | 1.5       |
| 10  |      | 2971.497   | 2971.496    | 0.3       |
| 11  |      | 3275.543   | 3275.542    | 0.3       |
| 13  | d    | 3868.636   | 3868.635    | 0.3       |
| 14  |      | 4157.683   | 4157.681    | 0.5       |
| 15  |      | 4446.731   | 4446.728    | 0.7       |
| 16  |      | 4775.780   | 4775.780    | 0.0       |
| 17  |      | 5064.832   | 5064.826    | 1.2       |
| 18  |      | 5353.875   | 5353.873    | 0.4       |
| 19  |      | 5666.930   | 5666.930    | 0.0       |
| 1   |      | 289.046    | 289.046     | 0.0       |
| 2   |      | 602.104    | 602.103     | 1.7       |
| 3   |      | 891.151    | 891.150     | 1.1       |
| 5   | x    | 1509.249   | 1509.249    | 0.0       |
| 16  |      | 4781.780   | 4781.780    | 0.0       |
| 18  |      | 5359.892   | 5359.873    | 3.5       |
| 2   |      | 620.115    | 620.113     | 3.2       |
| 3   |      | 909.161    | 909.159     | 2.2       |
| 4   |      | 1198.207   | 1198.205    | 1.7       |
| 5   |      | 1527.261   | 1527.257    | 2.6       |
| 6   |      | 1816.307   | 1816.303    | 2.2       |
| 7   |      | 2105.353   | 2105.349    | 1.9       |
| 8   |      | 2394.403   | 2394.395    | 3.3       |
| 9   |      | 2698.443   | 2698.441    | 0.7       |
| 10  |      | 3002.491   | 3002.487    | 1.3       |
| 11  | w    | 3291.537   | 3291.533    | 1.2       |
| 12  |      | 3580.589   | 3580.579    | 2.8       |
| 13  |      | 3884.632   | 3884.624    | 2.1       |
| 14  |      | 4173.676   | 4173.670    | 1.4       |
| 15  |      | 4486.733   | 4486.728    | 1.1       |
| 16  |      | 4799.785   | 4799.785    | 0.0       |
| 17  |      | 5088.839   | 5088.831    | 1.6       |
| 18  |      | 5377.884   | 5377.877    | 1.3       |
| 19  |      | 5666.930   | 5666.923    | 1.2       |

**Figure S13. (a)** UVPD spectrum of 6- charge state ( $m/z$  978) of single stranded 20-mer oligonucleotide CCC CAA CTC CTT CCC GCC AC, **(b)** deconvoluted spectrum and **(c)** tabulated sequence ion assignments and mass error values (ppm).

**(a)**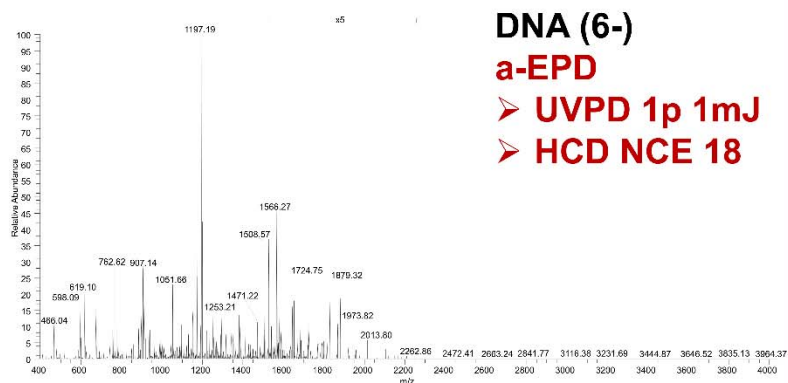**(b)**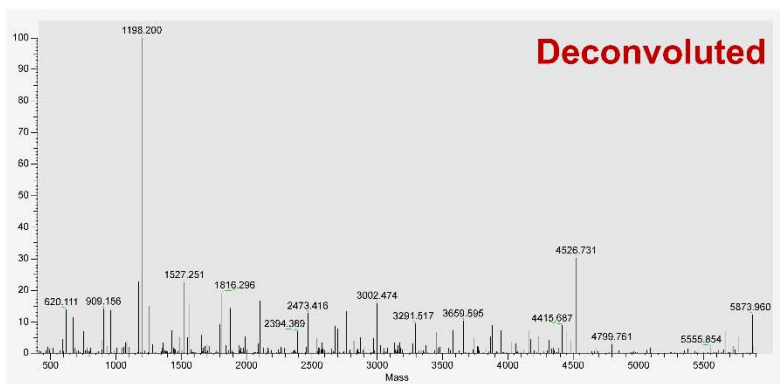**(c)**

| Ion | Type | Mass (Exp) | Mass (Theo) | ppm error |
|-----|------|------------|-------------|-----------|
| 3   |      | 676.125    | 676.128     | 4.4       |
| 4   |      | 965.170    | 965.174     | 4.1       |
| 5   |      | 1254.215   | 1254.220    | 4.0       |
| 6   |      | 1567.271   | 1567.277    | 3.8       |
| 7   |      | 1880.326   | 1880.334    | 4.3       |
| 8   |      | 2169.369   | 2169.380    | 5.1       |
| 9   |      | 2473.414   | 2473.426    | 4.9       |
| 10  |      | 2762.459   | 2762.472    | 4.7       |
| 11  |      | 3051.504   | 3051.518    | 4.6       |
| 12  |      | 3355.547   | 3355.564    | 5.1       |
| 13  |      | 3659.594   | 3659.610    | 4.4       |
| 14  |      | 3948.638   | 3948.656    | 4.6       |
| 15  |      | 4237.682   | 4237.702    | 4.7       |
| 16  |      | 4526.727   | 4526.748    | 4.6       |
| 19  |      | 5433.867   | 5433.892    | 4.6       |
| 2   |      | 497.116    | 497.118     | 4.0       |
| 3   |      | 786.160    | 786.164     | 5.1       |
| 4   |      | 1075.204   | 1075.211    | 6.5       |
| 6   |      | 1701.316   | 1701.326    | 5.9       |
| 7   |      | 1990.360   | 1990.372    | 6.0       |
| 8   |      | 2294.404   | 2294.418    | 6.1       |
| 9   |      | 2583.449   | 2583.465    | 6.2       |
| 10  |      | 2872.497   | 2872.511    | 4.9       |
| 11  |      | 3176.540   | 3176.557    | 5.4       |
| 13  |      | 3769.629   | 3769.650    | 5.6       |
| 14  |      | 4058.675   | 4058.696    | 5.2       |
| 15  |      | 4347.720   | 4347.742    | 5.1       |
| 16  |      | 4676.769   | 4676.795    | 5.6       |
| 17  |      | 4965.810   | 4965.841    | 6.2       |
| 18  |      | 5254.858   | 5254.888    | 5.7       |
| 19  |      | 5567.913   | 5567.945    | 5.7       |
| 6   |      | 1717.311   | 1717.321    | 5.8       |
| 7   |      | 2006.355   | 2006.367    | 6.0       |
| 9   |      | 2599.444   | 2599.460    | 6.2       |
| 11  |      | 3192.532   | 3192.552    | 6.3       |
| 13  |      | 3785.625   | 3785.645    | 5.3       |
| 14  |      | 4074.667   | 4074.691    | 5.9       |
| 2   |      | 521.127    | 521.129     | 3.8       |
| 3   |      | 810.171    | 810.176     | 6.2       |
| 4   |      | 1099.215   | 1099.222    | 6.4       |
| 5   |      | 1428.267   | 1428.275    | 5.6       |
| 6   |      | 1717.311   | 1717.321    | 5.8       |
| 7   |      | 2006.355   | 2006.367    | 6.0       |
| 8   |      | 2295.406   | 2295.414    | 3.5       |
| 9   |      | 2599.444   | 2599.460    | 6.2       |
| 10  |      | 2903.489   | 2903.506    | 5.9       |
| 11  |      | 3192.532   | 3192.552    | 6.3       |
| 12  |      | 3481.585   | 3481.598    | 3.7       |
| 13  |      | 3785.625   | 3785.645    | 5.3       |
| 14  |      | 4074.667   | 4074.691    | 5.9       |
| 15  |      | 4387.727   | 4387.749    | 5.0       |
| 17  |      | 4989.820   | 4989.852    | 6.4       |
| 18  |      | 5278.865   | 5278.899    | 6.4       |
| 19  |      | 5567.913   | 5567.945    | 5.7       |
| 4   |      | 1156.178   | 1156.191    | 11.2      |
| 7   |      | 2071.334   | 2071.352    | 8.7       |
| 8   |      | 2375.374   | 2375.397    | 9.7       |
| 10  |      | 2953.469   | 2953.489    | 6.8       |
| 11  |      | 3257.516   | 3257.535    | 5.8       |
| 13  |      | 3850.597   | 3850.627    | 7.8       |
| 16  |      | 4757.746   | 4757.771    | 5.3       |
| 17  |      | 5046.801   | 5046.817    | 3.2       |
| 2   |      | 596.100    | 596.103     | 5.0       |
| 3   |      | 885.144    | 885.150     | 6.8       |
| 4   |      | 1174.189   | 1174.196    | 6.0       |
| 5   |      | 1487.245   | 1487.254    | 6.1       |
| 6   |      | 1800.300   | 1800.311    | 6.1       |
| 7   |      | 2089.343   | 2089.358    | 7.2       |
| 9   |      | 2682.436   | 2682.450    | 5.2       |
| 10  |      | 2971.479   | 2971.496    | 5.7       |
| 11  |      | 3275.522   | 3275.542    | 6.1       |
| 12  |      | 3579.564   | 3579.588    | 6.7       |
| 13  |      | 3868.612   | 3868.635    | 5.9       |
| 14  |      | 4157.656   | 4157.681    | 6.0       |
| 15  |      | 4446.701   | 4446.728    | 6.1       |
| 16  |      | 4775.752   | 4775.780    | 5.9       |
| 17  |      | 5064.799   | 5064.826    | 5.3       |
| 2   |      | 602.101    | 602.103     | 3.3       |
| 3   |      | 891.144    | 891.150     | 6.7       |
| 5   |      | 1509.240   | 1509.249    | 6.0       |
| 6   |      | 1798.286   | 1798.295    | 5.0       |
| 7   |      | 2087.329   | 2087.341    | 5.7       |
| 15  |      | 4468.695   | 4468.722    | 6.0       |
| 17  |      | 5070.800   | 5070.826    | 5.1       |
| 2   |      | 620.111    | 620.113     | 3.2       |
| 3   |      | 909.155    | 909.159     | 4.4       |
| 4   |      | 1198.200   | 1198.205    | 4.2       |
| 5   |      | 1527.251   | 1527.257    | 3.9       |
| 6   |      | 1816.295   | 1816.303    | 4.4       |
| 7   |      | 2105.340   | 2105.349    | 4.3       |
| 8   |      | 2394.387   | 2394.395    | 3.3       |
| 9   |      | 2689.427   | 2689.441    | 5.2       |
| 10  |      | 3002.473   | 3002.487    | 4.7       |
| 11  |      | 3291.517   | 3291.533    | 4.9       |
| 12  |      | 3580.567   | 3580.579    | 3.4       |
| 13  |      | 3884.606   | 3884.624    | 4.6       |
| 14  |      | 4173.650   | 4173.670    | 4.8       |
| 15  |      | 4486.706   | 4486.728    | 4.9       |
| 16  |      | 4799.761   | 4799.785    | 5.0       |
| 17  |      | 5088.805   | 5088.831    | 5.1       |
| 18  |      | 5377.849   | 5377.877    | 5.2       |
| 19  |      | 5666.895   | 5666.923    | 4.9       |

**Figure S14. (a)** a-EPD spectrum of 6- charge state (UVPD of 6- of  $m/z$  978, HCD of subsequent 5•- of  $m/z$  1174) of single stranded 20-mer oligonucleotide CCC CAA CTC CTT CCC GCC AC, **(b)** deconvoluted spectrum and **(c)** tabulated sequence ion assignments and mass error values (ppm).

**(a)**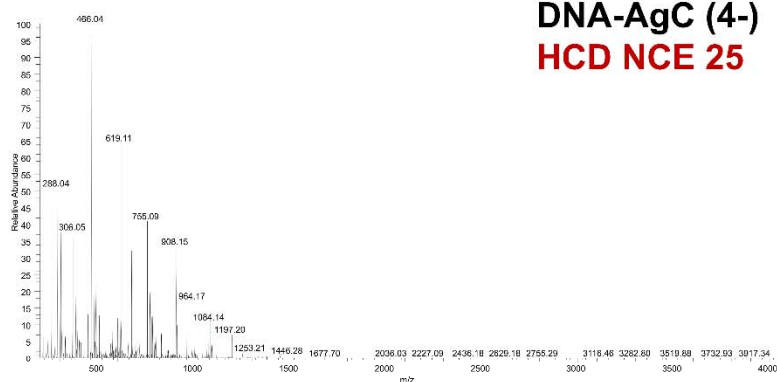**(b)**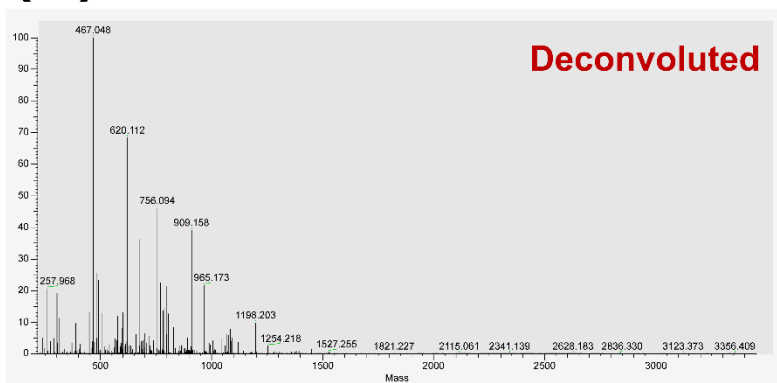**(c)**

| Ion | Type | Mass (Exp) | Mass (Theo) | ppm error |
|-----|------|------------|-------------|-----------|
| 2   |      | 387.082    | 387.082     | 0.0       |
| 3   | a-B  | 676.127    | 676.128     | 1.5       |
| 4   |      | 965.173    | 965.174     | 1.0       |
| 5   |      | 1254.218   | 1254.220    | 1.6       |
| 6   |      | 1567.274   | 1567.277    | 1.9       |
| 7   |      | 1880.330   | 1880.334    | 2.1       |
| 2   | y    | 540.146    | 540.147     | 1.9       |
| 3   |      | 829.192    | 829.193     | 1.2       |
| 4   |      | 1118.237   | 1118.239    | 1.8       |
| 5   |      | 1447.289   | 1447.291    | 1.4       |
| 2   | c    | 578.091    | 578.099     | 13.8      |
| 3   |      | 867.136    | 867.145     | 10.4      |
| 4   |      | 1156.181   | 1156.191    | 8.6       |
| 2   |      | 596.101    | 596.103     | 3.4       |
| 3   | d    | 885.147    | 885.150     | 3.4       |
| 2   |      | 602.102    | 602.103     | 1.7       |
| 3   |      | 891.147    | 891.150     | 3.4       |
| 4   |      | 1180.192   | 1180.196    | 3.4       |
| 5   |      | 1509.245   | 1509.249    | 2.7       |
| 2   | w    | 620.112    | 620.113     | 1.6       |
| 3   |      | 909.158    | 909.159     | 1.1       |
| 4   |      | 1198.203   | 1198.205    | 1.7       |
| 5   |      | 1527.255   | 1527.257    | 1.3       |

**Figure S15. (a)** HCD spectrum of 4- charge state ( $m/z$  1736) of single stranded 20-mer oligonucleotide CCC CAA CTC CTT CCC GCC AC with silver cluster, **(b)** deconvoluted spectrum and **(c)** tabulated sequence ion assignments and mass error values (ppm). The columns entitled Ion and Type indicate the assignment of the fragment ion:  $a_n$ -B,  $c_n$ ,  $d_n$ ,  $x_n$ ,  $y_n$ ,  $w_n$ ,  $z_n$ , in which the number  $n$  (listed in the Ion column) represents the number of nucleotides contained in the fragment. Ions are grouped by type.

**(a)**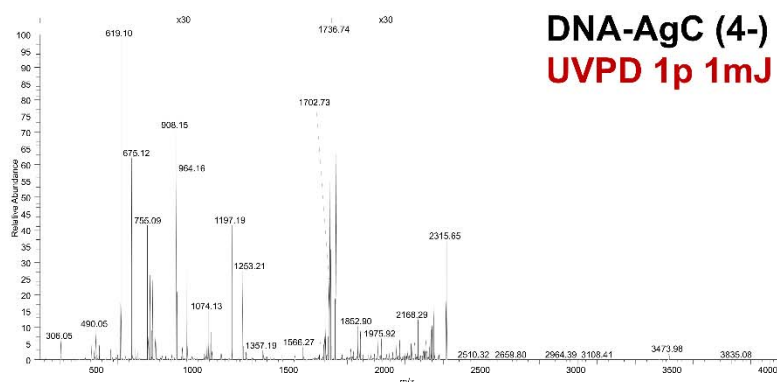**(b)**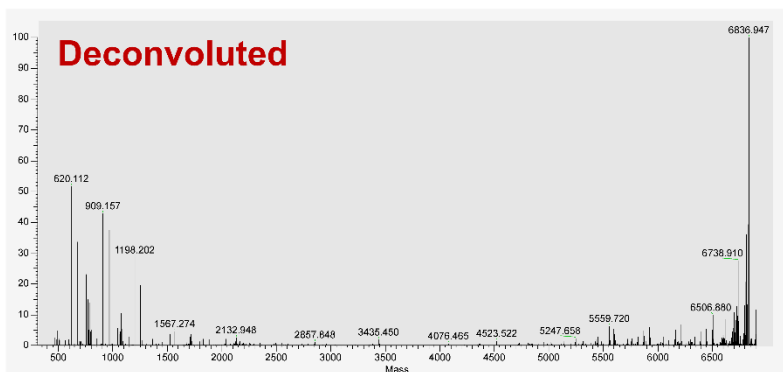**(c)**

| Ion | Type | Mass (Exp) | Mass (Theo) | ppm error |
|-----|------|------------|-------------|-----------|
| 3   |      | 676.127    | 676.128     | 1.5       |
| 4   |      | 965.172    | 965.174     | 2.1       |
| 5   |      | 1254.218   | 1254.220    | 1.6       |
| 6   | a-B  | 1567.274   | 1567.277    | 1.9       |
| 7   |      | 1880.330   | 1880.334    | 2.1       |
| 8   |      | 2169.380   | 2169.380    | 0.0       |
| 9   |      | 2473.421   | 2473.426    | 2.0       |
| 15  | a    | 4347.663   | 4347.742    | 18.2      |
| 2   | y    | 829.191    | 829.193     | 2.4       |
| 3   |      | 1118.236   | 1118.239    | 2.7       |
| 2   | d    | 596.101    | 596.103     | 3.4       |
| 4   |      | 1174.191   | 1174.196    | 4.3       |
| 2   | x    | 602.102    | 602.103     | 1.7       |
| 3   |      | 891.146    | 891.150     | 4.5       |
| 2   | w    | 620.112    | 620.113     | 1.6       |
| 3   |      | 909.157    | 909.159     | 2.2       |
| 4   |      | 1198.202   | 1198.205    | 2.5       |
| 5   |      | 1527.254   | 1527.257    | 2.0       |
| 6   |      | 1816.299   | 1816.303    | 2.2       |
| 7   |      | 2105.344   | 2105.349    | 2.4       |

**Figure S16.** (a) UVPD spectrum of 4- charge state ( $m/z$  1736) of single stranded 20-mer oligonucleotide CCC CAA CTC CTT CCC GCC AC with silver cluster, (b) deconvoluted spectrum and (c) tabulated sequence ion assignments and mass error values (ppm). The columns entitled Ion and Type indicate the assignment of the fragment ion:  $a_n$ -B,  $c_n$ ,  $d_n$ ,  $x_n$ ,  $y_n$ ,  $w_n$ ,  $z_n$ , in which the number  $n$  (listed in the Ion column) represents the number of nucleotides contained in the fragment. Ions are grouped by type.

**(a)**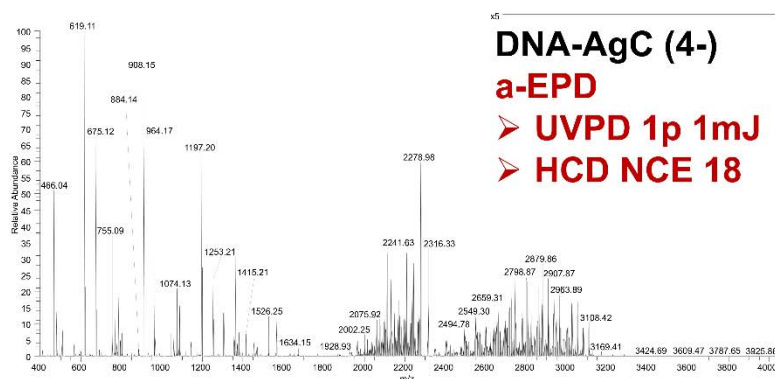**(b)**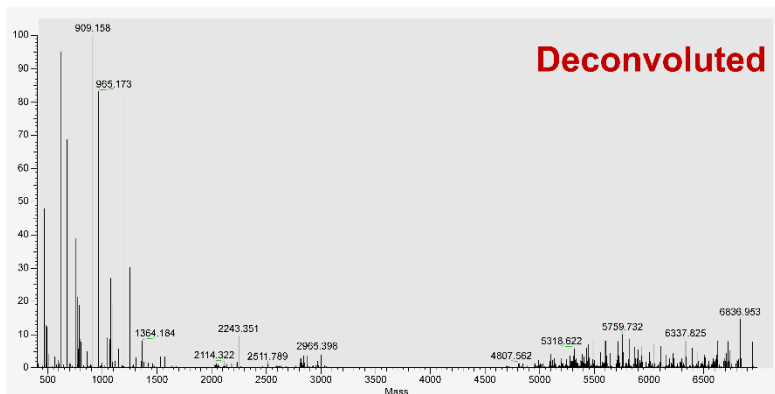**(c)**

| Ion | Type     | Mass (Exp) | Mass (Theo) | ppm error |
|-----|----------|------------|-------------|-----------|
| 3   | a-B      | 676.128    | 676.128     | 0.0       |
| 4   |          | 965.173    | 965.174     | 1.0       |
| 5   |          | 1254.219   | 1254.220    | 0.8       |
| 6   |          | 1567.276   | 1567.277    | 0.6       |
| 7   | 1880.332 | 1880.334   | 1.1         |           |
| 2   | y        | 540.147    | 540.147     | 0.0       |
| 3   |          | 829.192    | 829.193     | 1.2       |
| 4   |          | 1118.237   | 1118.239    | 1.8       |
| 5   |          | 1447.290   | 1447.291    | 0.7       |
| 2   | c        | 578.091    | 578.099     | 13.8      |
| 3   |          | 867.136    | 867.145     | 10.4      |
| 17  |          | 5046.740   | 5046.817    | 15.3      |
| 2   |          | 596.102    | 596.103     | 1.7       |
| 3   | d        | 885.147    | 885.150     | 3.4       |
| 4   |          | 1174.192   | 1174.196    | 3.4       |
| 17  |          | 5064.727   | 5064.826    | 19.5      |
| 2   | x        | 602.102    | 602.103     | 1.7       |
| 3   |          | 891.148    | 891.150     | 2.2       |
| 4   |          | 1180.193   | 1180.196    | 2.5       |
| 2   | w        | 620.113    | 620.113     | 0.0       |
| 3   |          | 909.158    | 909.159     | 1.1       |
| 4   |          | 1198.204   | 1198.205    | 0.8       |
| 5   |          | 1527.256   | 1527.257    | 0.7       |

**Figure S17. (a)** a-EPD spectrum of 4- charge state (UVPD of 4- of  $m/z$  1736, HCD of subsequent 3•- of  $m/z$  2315) of single stranded 20-mer oligonucleotide CCC CAA CTC CTT CCC GCC AC with silver cluster, **(b)** deconvoluted spectrum and **(c)** tabulated sequence ion assignments and mass error values (ppm).

The columns entitled Ion and Type indicate the assignment of the fragment ion:  $a_n$ -B,  $c_n$ ,  $d_n$ ,  $x_n$ ,  $y_n$ ,  $w_n$ ,  $z_n$ , in which the number n (listed in the Ion column) represents the number of nucleotides contained in the fragment. Ions are grouped by type.



**(a)**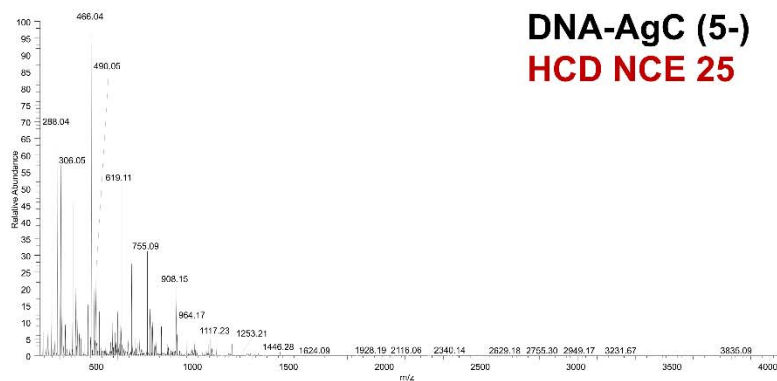**(b)**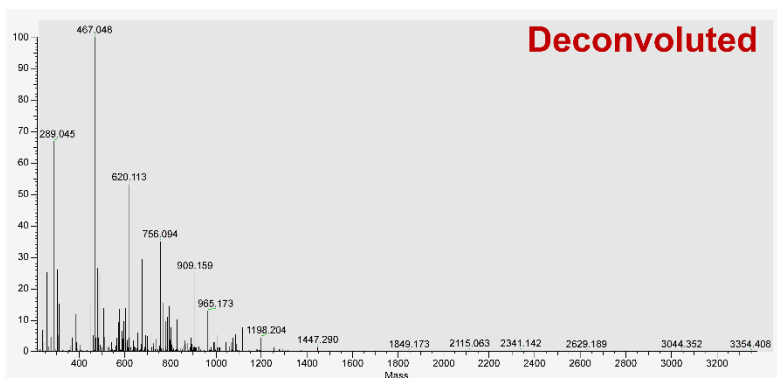**(c)**

| Ion | Type | Mass (Exp) | Mass (Theo) | ppm error |
|-----|------|------------|-------------|-----------|
| 2   |      | 387.082    | 387.082     | 0.0       |
| 3   |      | 676.128    | 676.128     | 0.0       |
| 4   | a-B  | 965.173    | 965.174     | 1.0       |
| 5   |      | 1254.219   | 1254.220    | 0.8       |
| 6   |      | 1567.275   | 1567.277    | 1.3       |
| 3   | b    | 802.171    | 802.160     | 13.7      |
| 2   |      | 540.147    | 540.147     | 0.0       |
| 3   | y    | 829.192    | 829.193     | 1.2       |
| 4   |      | 1118.238   | 1118.239    | 0.9       |
| 5   |      | 1447.290   | 1447.291    | 0.7       |
| 2   | c    | 578.091    | 578.099     | 13.8      |
| 3   |      | 867.137    | 867.145     | 9.2       |
| 2   | d    | 596.102    | 596.103     | 1.7       |
| 3   |      | 885.147    | 885.150     | 3.4       |
| 1   |      | 289.045    | 289.046     | 3.5       |
| 2   |      | 602.102    | 602.103     | 1.7       |
| 3   | x    | 891.148    | 891.150     | 2.2       |
| 4   |      | 1180.193   | 1180.196    | 2.5       |
| 5   |      | 1509.247   | 1509.249    | 1.3       |
| 2   | w    | 620.113    | 620.113     | 0.0       |
| 3   |      | 909.159    | 909.159     | 0.0       |
| 4   |      | 1198.204   | 1198.205    | 0.8       |

**Figure S18. (a)** HCD spectrum of 5- charge state ( $m/z$  1389) of single stranded 20-mer oligonucleotide CCC CAA CTC CTT CCC GCC AC with silver cluster, **(b)** deconvoluted spectrum and **(c)** tabulated sequence ion assignments and mass error values (ppm). The columns entitled Ion and Type indicate the assignment of the fragment ion:  $a_n$ -B,  $c_n$ ,  $d_n$ ,  $x_n$ ,  $y_n$ ,  $w_n$ ,  $z_n$ , in which the number  $n$  (listed in the Ion column) represents the number of nucleotides contained in the fragment. Ions are grouped by type.

**(a)**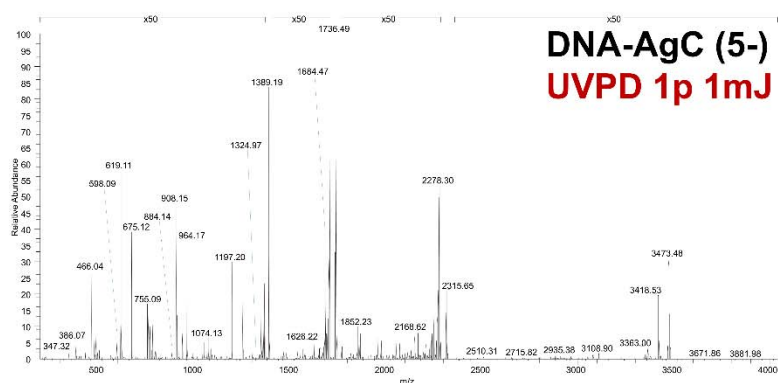**(b)**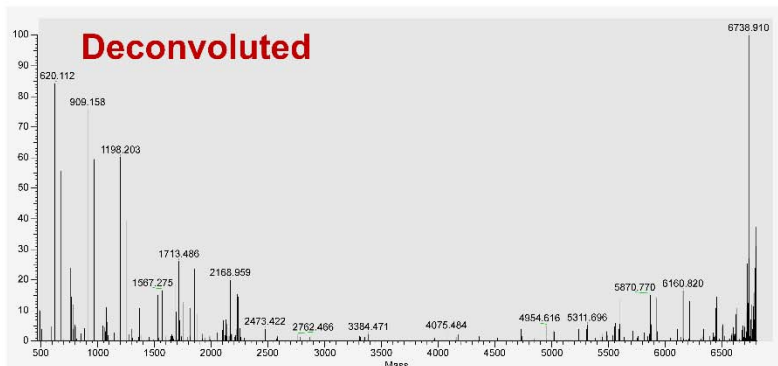**(c)**

| Ion | Type | Mass (Exp) | Mass (Theo) | ppm error |
|-----|------|------------|-------------|-----------|
| 3   |      | 676.127    | 676.128     | 1.5       |
| 4   |      | 965.173    | 965.174     | 1.0       |
| 5   | a-B  | 1254.218   | 1254.220    | 1.6       |
| 6   |      | 1567.275   | 1567.277    | 1.3       |
| 7   |      | 1880.331   | 1880.334    | 1.6       |
| 9   |      | 2473.422   | 2473.426    | 1.6       |
| 10  |      | 2762.466   | 2762.472    | 2.2       |
| 2   | d    | 596.101    | 596.103     | 3.4       |
| 3   |      | 885.147    | 885.150     | 3.4       |
| 4   |      | 1174.192   | 1174.196    | 3.4       |
| 5   |      | 1487.249   | 1487.254    | 3.4       |
| 6   |      | 1800.304   | 1800.311    | 3.9       |
| 2   | w    | 620.112    | 620.113     | 1.6       |
| 3   |      | 909.158    | 909.159     | 1.1       |
| 4   |      | 1198.203   | 1198.205    | 1.7       |
| 5   |      | 1527.255   | 1527.257    | 1.3       |
| 6   |      | 1816.300   | 1816.303    | 1.7       |
| 7   |      | 2105.346   | 2105.349    | 1.4       |

**Figure S19.** (a) UVPD spectrum of 5- charge state ( $m/z$  1389) of single stranded 20-mer oligonucleotide CCC CAA CTC CTT CCC GCC AC with silver cluster, (b) deconvoluted spectrum and (c) tabulated sequence ion assignments and mass error values (ppm). The columns entitled Ion and Type indicate the assignment of the fragment ion:  $a_n$ -B,  $c_n$ ,  $d_n$ ,  $x_n$ ,  $y_n$ ,  $w_n$ ,  $z_n$ , in which the number n (listed in the Ion column) represents the number of nucleotides contained in the fragment. Ions are grouped by type.



**(a)**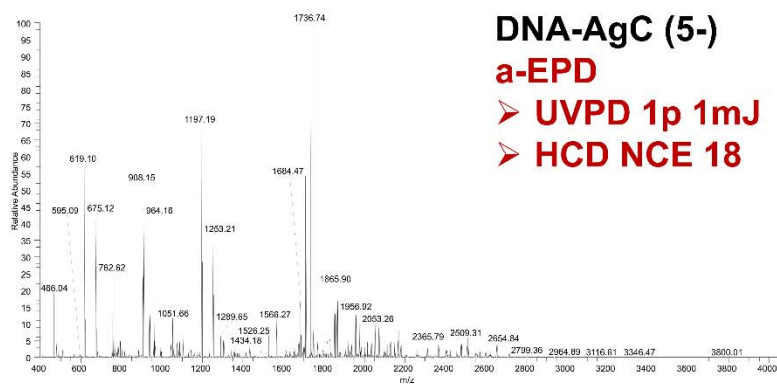**(b)**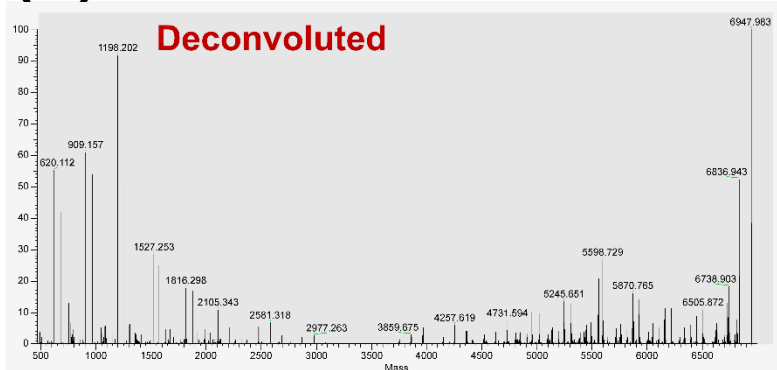**(c)**

| Ion | Type | Mass (Exp) | Mass (Theo) | ppm error |
|-----|------|------------|-------------|-----------|
| 3   |      | 676.127    | 676.128     | 1.5       |
| 4   |      | 965.171    | 965.174     | 3.1       |
| 5   |      | 1254.217   | 1254.220    | 2.4       |
| 6   | a-B  | 1567.273   | 1567.277    | 2.6       |
| 7   |      | 1880.329   | 1880.334    | 2.7       |
| 9   |      | 2473.419   | 2473.426    | 2.8       |
| 10  |      | 2762.464   | 2762.472    | 2.9       |
| 2   | a    | 497.116    | 497.118     | 4.0       |
| 18  |      | 5254.812   | 5254.888    | 14.5      |
| 8   | z    | 2295.416   | 2295.414    | 0.9       |
| 2   |      | 540.146    | 540.147     | 1.9       |
| 5   |      | 1447.288   | 1447.291    | 2.1       |
| 6   | y    | 1736.332   | 1736.337    | 2.9       |
| 7   |      | 2025.377   | 2025.383    | 3.0       |
| 2   |      | 578.090    | 578.099     | 15.6      |
| 3   |      | 867.135    | 867.145     | 11.5      |
| 4   | c    | 1156.180   | 1156.191    | 9.5       |
| 8   |      | 2375.383   | 2375.397    | 5.9       |
| 18  |      | 5335.762   | 5335.863    | 18.9      |
| 2   |      | 596.101    | 596.103     | 3.4       |
| 3   |      | 885.145    | 885.150     | 5.6       |
| 4   | d    | 1174.191   | 1174.196    | 4.3       |
| 5   |      | 1487.247   | 1487.254    | 4.7       |
| 6   |      | 1800.303   | 1800.311    | 4.4       |
| 2   |      | 602.101    | 602.103     | 3.3       |
| 3   | x    | 891.146    | 891.150     | 4.5       |
| 2   |      | 620.112    | 620.113     | 1.6       |
| 3   |      | 909.157    | 909.159     | 2.2       |
| 4   |      | 1198.202   | 1198.205    | 2.5       |
| 5   | w    | 1527.253   | 1527.257    | 2.6       |
| 6   |      | 1816.298   | 1816.303    | 2.8       |
| 7   |      | 2105.342   | 2105.349    | 3.3       |
| 8   |      | 2394.390   | 2394.395    | 2.1       |
| 17  |      | 5088.736   | 5088.831    | 18.7      |

**Figure S20.** (a) a-EPD spectrum of 5- charge state (UVPD of 5- of  $m/z$  1389, HCD of subsequent 4•- of  $m/z$  1736) of single stranded 20-mer oligonucleotide CCC CAA CTC CTT CCC GCC AC with silver cluster, (b) deconvoluted spectrum and (c) tabulated sequence ion assignments and mass error values (ppm). The columns entitled Ion and Type indicate the assignment of the fragment ion:  $a_n$ -B,  $c_n$ ,  $d_n$ ,  $x_n$ ,  $y_n$ ,  $w_n$ ,  $z_n$ , in which the number  $n$  (listed in the Ion column) represents the number of nucleotides contained in the fragment. Ions are grouped by type.

**(a)**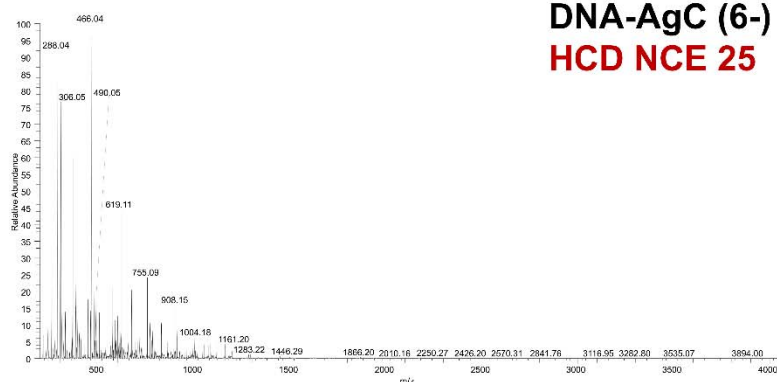

**DNA-AgC (6-)**  
**HCD NCE 25**

**(c)**

| Ion | Type | Mass (Exp) | Mass (Theo) | ppm error |
|-----|------|------------|-------------|-----------|
| 2   |      | 387.083    | 387.082     | 2.6       |
| 3   | a-B  | 676.130    | 676.128     | 3.0       |
| 5   |      | 1254.223   | 1254.220    | 2.4       |
| 4   | b    | 1091.219   | 1091.206    | 11.9      |
| 2   |      | 540.149    | 540.147     | 3.7       |
| 3   | y    | 829.195    | 829.193     | 2.4       |
| 4   |      | 1118.241   | 1118.239    | 1.8       |
| 5   |      | 1447.295   | 1447.291    | 2.8       |
| 2   |      | 578.093    | 578.099     | 10.4      |
| 3   | c    | 867.140    | 867.145     | 5.8       |
| 4   |      | 1156.198   | 1156.191    | 6.1       |
| 2   | d    | 596.104    | 596.103     | 1.7       |
| 1   |      | 289.046    | 289.046     | 0.0       |
| 2   |      | 602.104    | 602.103     | 1.7       |
| 3   | x    | 891.151    | 891.150     | 1.1       |
| 4   |      | 1180.197   | 1180.196    | 0.8       |
| 2   |      | 620.115    | 620.113     | 3.2       |
| 3   | w    | 909.161    | 909.159     | 2.2       |
| 4   |      | 1198.208   | 1198.205    | 2.5       |

**(b)**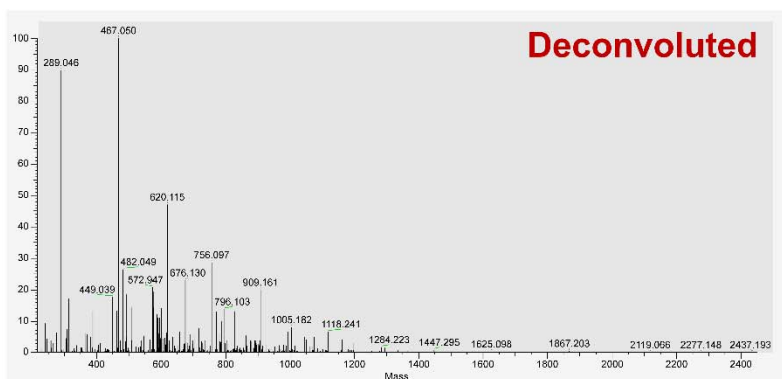

**Deconvoluted**

**Figure S21.** (a) HCD spectrum of 6- charge state ( $m/z$  1157) of single stranded 20-mer oligonucleotide CCC CAA CTC CTT CCC GCC AC with silver cluster, (b) deconvoluted spectrum and (c) tabulated sequence ion assignments and mass error values (ppm). The columns entitled Ion and Type indicate the assignment of the fragment ion:  $a_n$ -B,  $c_n$ ,  $d_n$ ,  $x_n$ ,  $y_n$ ,  $w_n$ ,  $z_n$ , in which the number  $n$  (listed in the Ion column) represents the number of nucleotides contained in the fragment. Ions are grouped by type.

**(a)**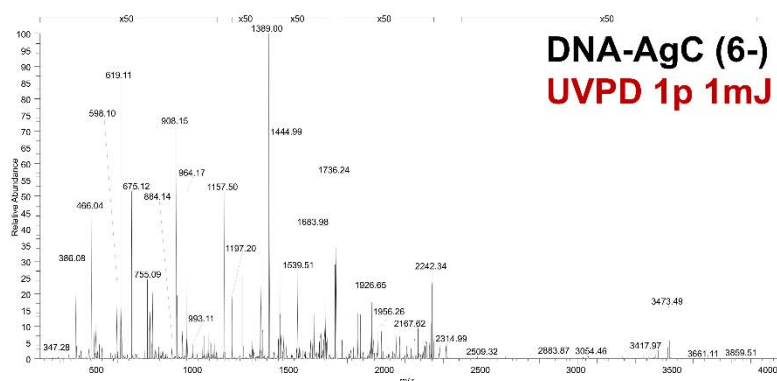**(b)**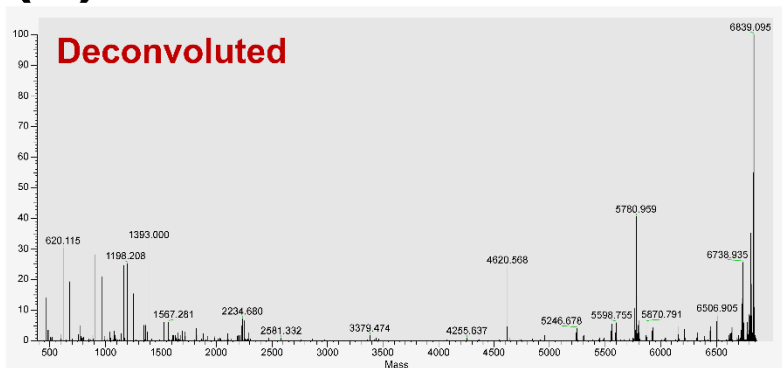**(c)**

| Ion | Type | Mass (Exp) | Mass (Theo) | ppm error |
|-----|------|------------|-------------|-----------|
| 2   | a-B  | 387.083    | 387.082     | 2.6       |
| 3   |      | 676.130    | 676.128     | 3.0       |
| 4   |      | 965.177    | 965.174     | 3.1       |
| 5   |      | 1254.223   | 1254.220    | 2.4       |
| 6   |      | 1567.281   | 1567.277    | 2.6       |
| 7   |      | 1880.339   | 1880.334    | 2.7       |
| 8   | a    | 2169.380   | 2169.380    | 0.0       |
| 9   |      | 2473.432   | 2473.426    | 2.4       |
| 10  |      | 2762.477   | 2762.472    | 1.8       |
| 5   |      | 1388.270   | 1388.268    | 1.4       |
| 2   | z    | 521.130    | 521.129     | 1.9       |
| 2   |      | 596.104    | 596.103     | 1.7       |
| 3   |      | 885.150    | 885.150     | 0.0       |
| 4   | d    | 1174.196   | 1174.196    | 0.0       |
| 5   |      | 1487.255   | 1487.254    | 0.7       |
| 6   |      | 1800.311   | 1800.311    | 0.0       |
| 2   | w    | 620.115    | 620.113     | 3.2       |
| 3   |      | 909.162    | 909.159     | 3.3       |
| 4   |      | 1198.208   | 1198.205    | 2.5       |
| 5   |      | 1527.261   | 1527.257    | 2.6       |
| 6   |      | 1816.307   | 1816.303    | 2.2       |
| 6   |      | 2105.354   | 2105.349    | 2.4       |
| 7   |      | 2105.354   | 2105.349    | 2.4       |

**Figure S22.** (a) UVPD spectrum of 6- charge state ( $m/z$  1157) of single stranded 20-mer oligonucleotide CCC CAA CTC CTT CCC GCC AC with silver cluster, (b) deconvoluted spectrum and (c) tabulated sequence ion assignments and mass error values (ppm). The columns entitled Ion and Type indicate the assignment of the fragment ion:  $a_n$ -B,  $c_n$ ,  $d_n$ ,  $x_n$ ,  $y_n$ ,  $w_n$ ,  $z_n$ , in which the number n (listed in the Ion column) represents the number of nucleotides contained in the fragment. Ions are grouped by type.

**(a)**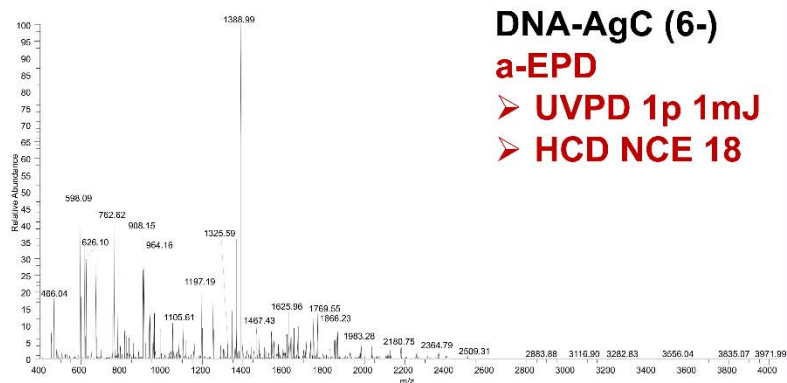**(b)**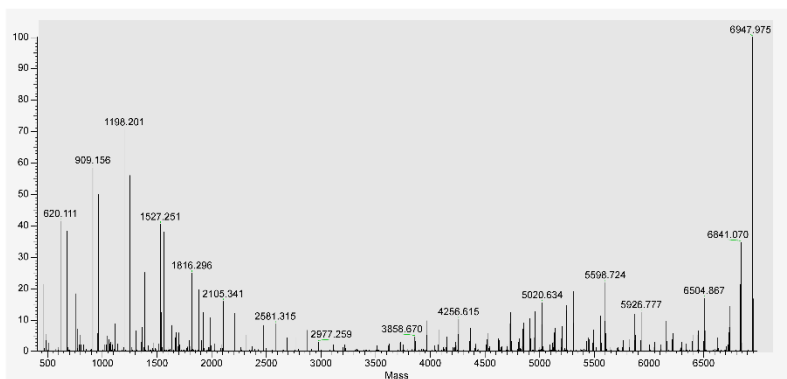**(c)**

| Ion | Type | Mass (Exp) | Mass (Theo) | ppm error |
|-----|------|------------|-------------|-----------|
| 3   | a-B  | 676.126    | 676.128     | 3.0       |
| 4   |      | 965.171    | 965.174     | 3.1       |
| 5   |      | 1254.216   | 1254.220    | 3.2       |
| 6   |      | 1567.271   | 1567.277    | 3.8       |
| 7   |      | 1880.327   | 1880.334    | 3.7       |
| 9   | b    | 2473.416   | 2473.426    | 4.0       |
| 10  |      | 2762.461   | 2762.472    | 4.0       |
| 17  | z    | 4981.835   | 4981.836    | 0.2       |
| 8   |      | 2295.413   | 2295.414    | 0.4       |
| 3   | y    | 829.190    | 829.193     | 3.6       |
| 4   |      | 1118.235   | 1118.239    | 3.6       |
| 5   |      | 1447.286   | 1447.291    | 3.5       |
| 7   |      | 2025.375   | 2025.383    | 3.9       |
| 2   |      | 578.090    | 578.099     | 15.6      |
| 3   | c    | 867.135    | 867.145     | 11.5      |
| 18  |      | 5335.761   | 5335.863    | 19.1      |
| 2   | d    | 596.100    | 596.103     | 5.0       |
| 4   |      | 1174.189   | 1174.196    | 6.0       |
| 5   |      | 1487.246   | 1487.254    | 5.4       |
| 6   |      | 1800.300   | 1800.311    | 6.1       |
| 9   |      | 2682.435   | 2682.450    | 5.6       |
| 2   | x    | 602.101    | 602.103     | 3.3       |
| 3   |      | 891.146    | 891.150     | 4.5       |
| 5   |      | 1509.241   | 1509.249    | 5.3       |
| 2   |      | 620.111    | 620.113     | 3.2       |
| 3   |      | 909.156    | 909.159     | 3.3       |
| 4   | w    | 1198.201   | 1198.205    | 3.3       |
| 5   |      | 1527.251   | 1527.257    | 3.9       |
| 6   |      | 1816.296   | 1816.303    | 3.9       |
| 7   |      | 2105.341   | 2105.349    | 3.8       |
| 8   |      | 2394.385   | 2394.395    | 4.2       |
| 10  |      | 3002.474   | 3002.487    | 4.3       |

**Figure S23.** (a) a-EPD spectrum of 6- charge state (UVPD of 6- of  $m/z$  1157, HCD of subsequent 5•- of  $m/z$  1388) of single stranded 20-mer oligonucleotide CCC CAA CTC CTT CCC GCC AC with silver cluster, (b) deconvoluted spectrum and (c) tabulated sequence ion assignments and mass error values (ppm). The columns entitled Ion and Type indicate the assignment of the fragment ion:  $a_n$ -B,  $c_n$ ,  $d_n$ ,  $x_n$ ,  $y_n$ ,  $w_n$ ,  $z_n$ , in which the number n (listed in the Ion column) represents the number of nucleotides contained in the fragment. Ions are grouped by type.

### (a) ssDNA

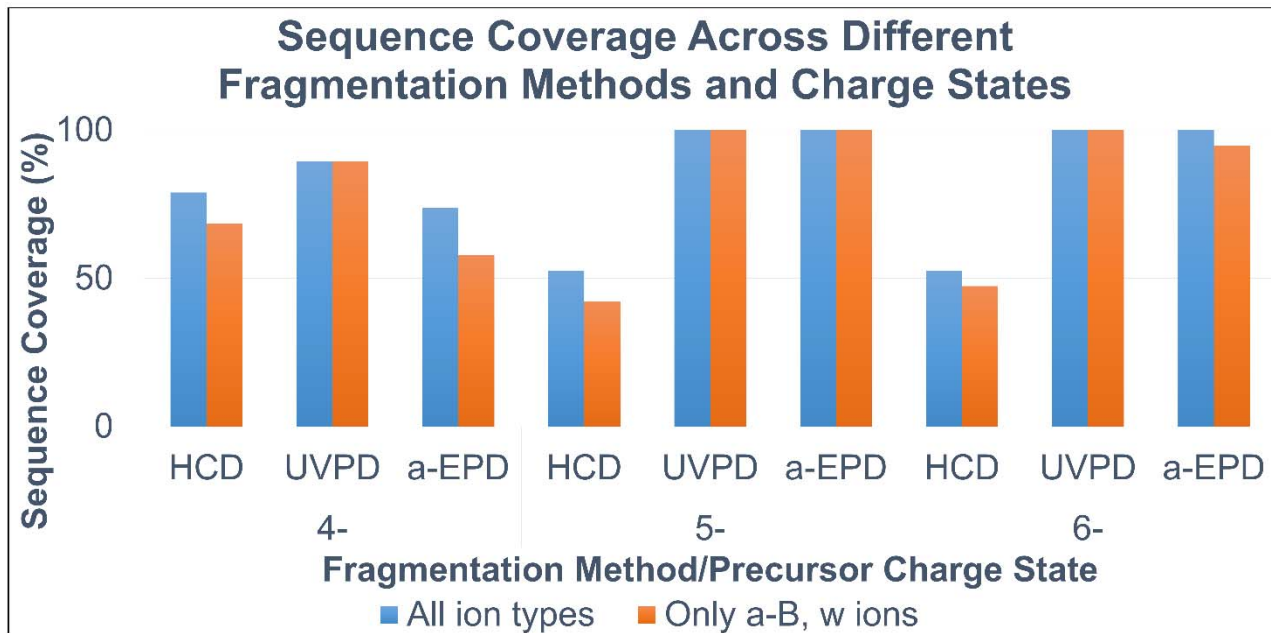

### (b) ssDNA-AgC

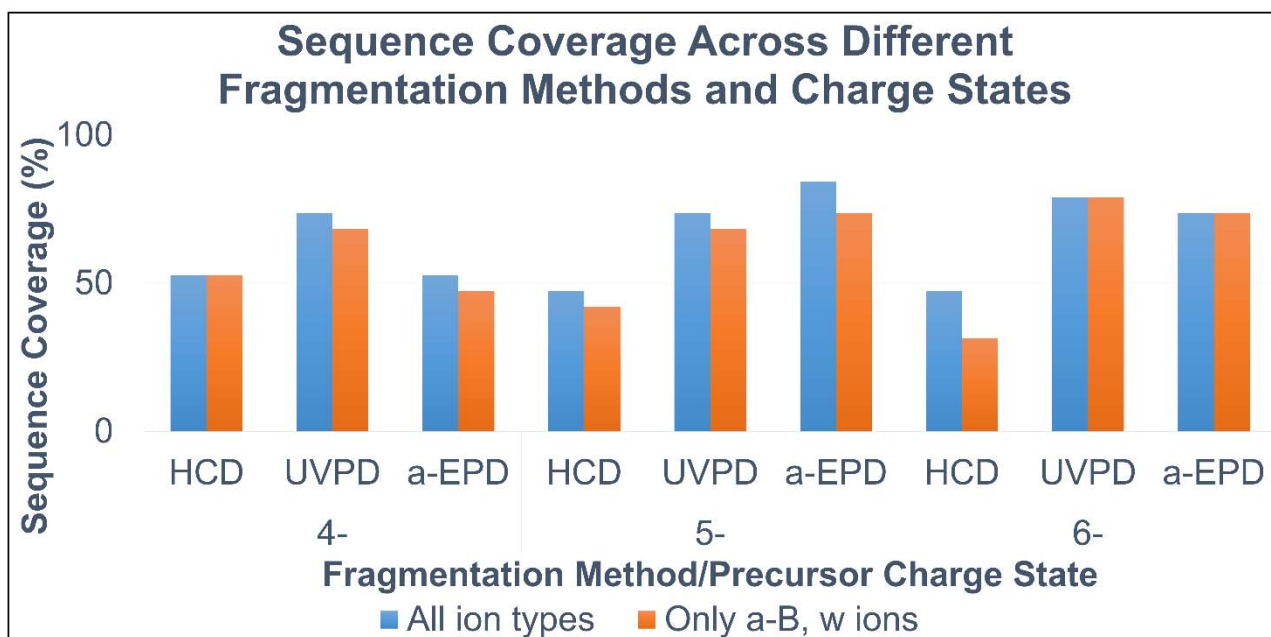

**Figure S24.** Bar graphs of single stranded 20-mer oligonucleotide CCC CAA CTC CTT CCC GCC AC sequence coverage for (a) lone DNA and (b) DNA-silver cluster sample across different fragmentation methods and charge states. Graphs show calculated sequence coverage when all ion types are included (blue) and when solely *a*-B and *w* ions are included (orange).

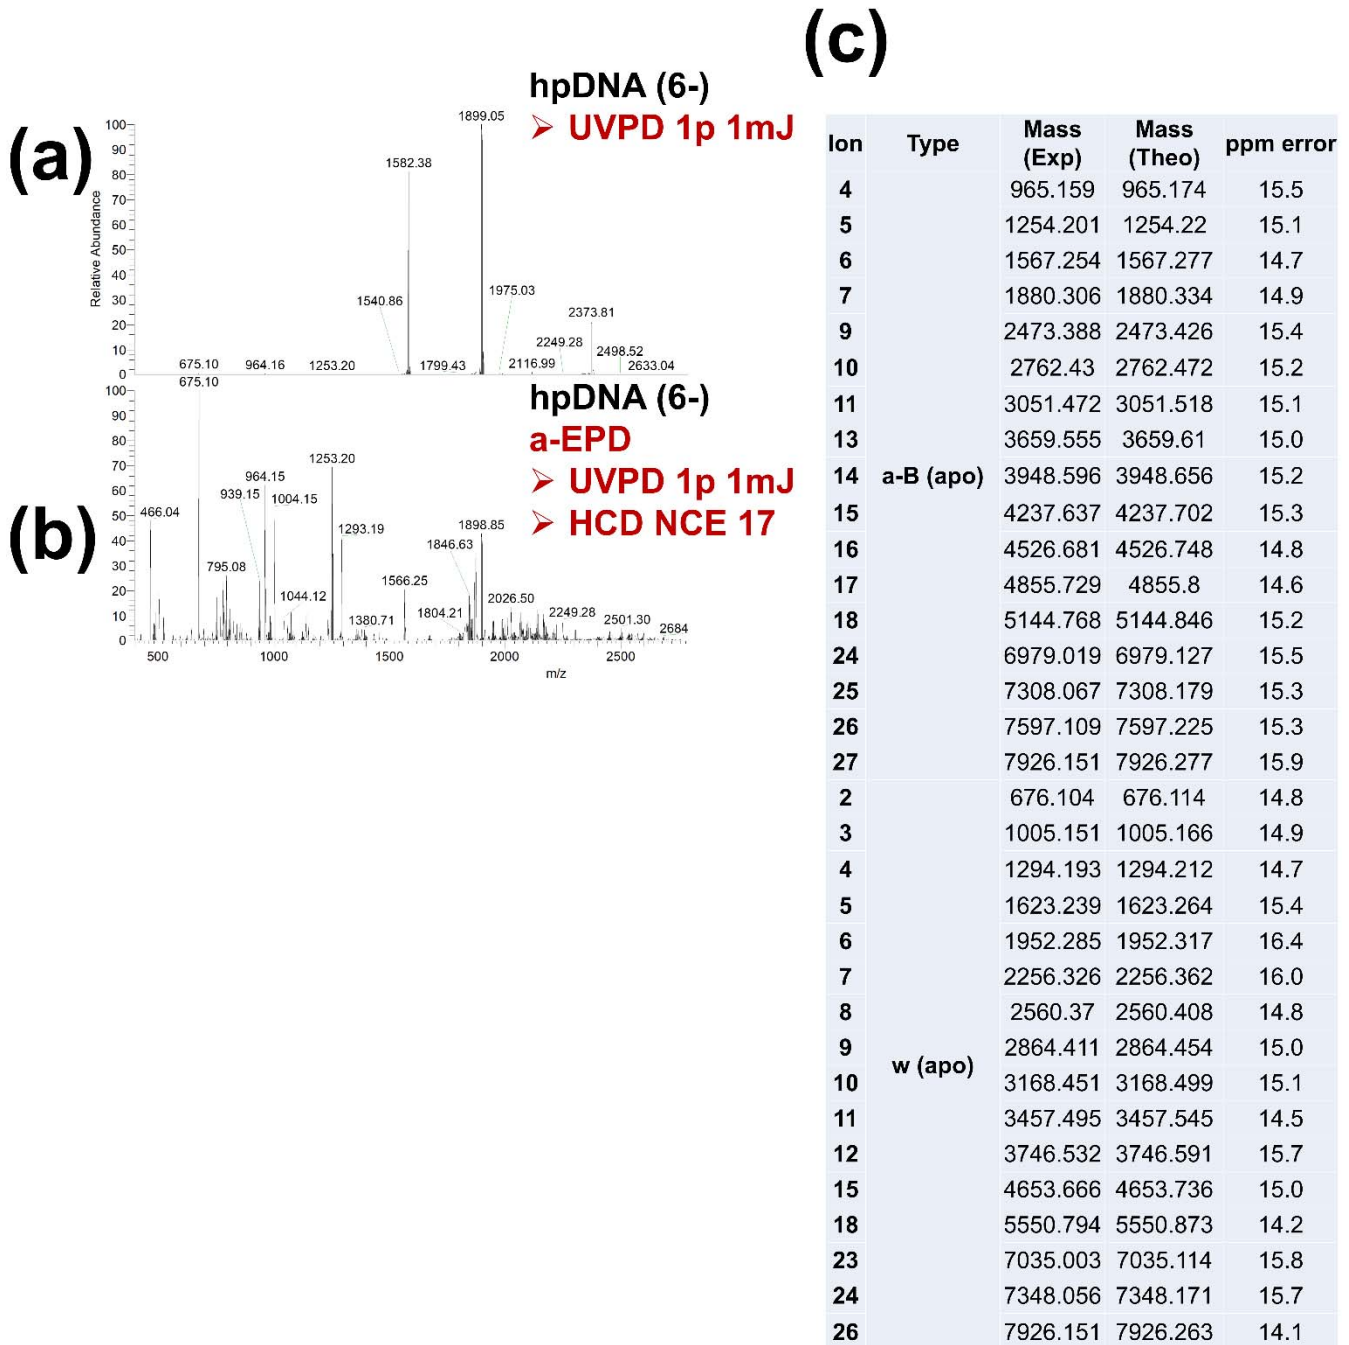

**Figure S25.** (a) UVPD spectrum of 6- charge state ( $m/z$  1403) and (b) a-EPD spectrum of 6- charge state (UVPD of  $m/z$  1403 followed HCD of 5•- charge state of  $m/z$  1684) of hpDNA sample CCC CAA CTC CTT CCC GCC TTT TGG CGG G; (c) tabulated sequence ion assignments and mass error values (ppm). The columns entitled Ion and Type indicate the assignment of the fragment ion:  $a_n$ -B,  $c_n$ ,  $d_n$ ,  $x_n$ ,  $y_n$ ,  $w_n$ ,  $z_n$ , in which the number n (listed in the Ion column) represents the number of nucleotides contained in the fragment. Ions are grouped by type.



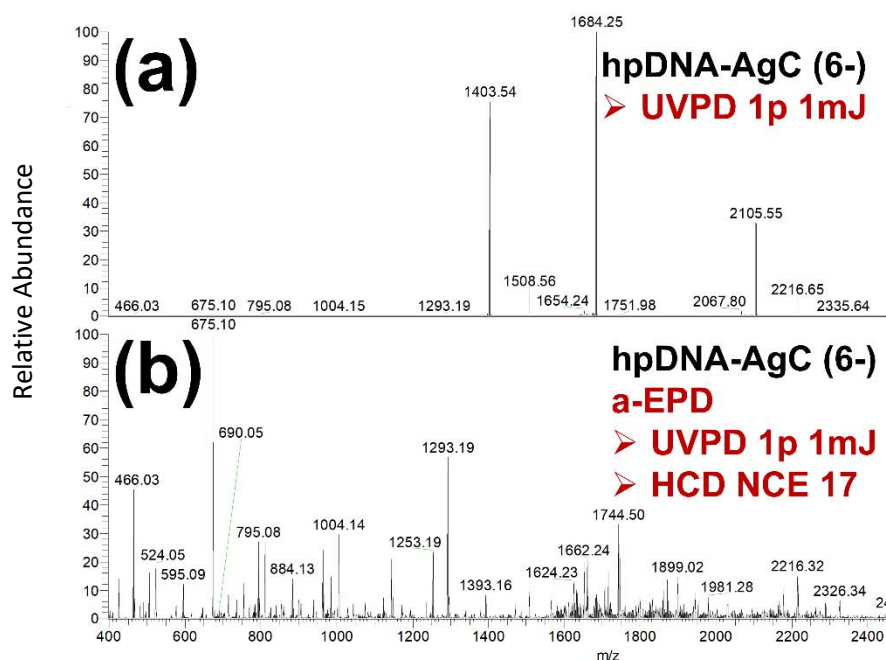

**(c)**

| Ion | Type       | Mass (Exp) | Mass (Theo) | ppm error       |
|-----|------------|------------|-------------|-----------------|
| 4   |            | 965.162    | 965.174     | 12.4            |
| 5   |            | 1254.204   | 1254.22     | 12.8            |
| 6   | a-B (apo)  | 1567.258   | 1567.277    | 12.1            |
| 7   |            | 1880.31    | 1880.334    | 12.8            |
| 9   |            | 2473.394   | 2473.426    | 12.9            |
| 10  |            | 2762.439   | 2762.472    | 11.9            |
| 2   |            | 676.106    | 676.114     | 11.8            |
| 4   | w (apo)    | 1294.196   | 1294.212    | 12.4            |
| 5   |            | 1623.243   | 1623.264    | 12.9            |
| Ion | Type       | Mass (Exp) | Mass (Theo) | mass error (Da) |
| 23  |            | 7723.974   | 7719.125    | 4.85            |
| 24  | a-B (holo) | 8050.026   | 8048.177    | 1.85            |
| 25  |            | 8379.078   | 8377.229    | 1.85            |
| 26  |            | 8668.116   | 8666.275    | 1.84            |
| 20  |            | 7201.839   | 7198.015    | 3.82            |
| 21  |            | 7507.908   | 7502.061    | 5.85            |
| 22  | w (holo)   | 7794.962   | 7791.107    | 3.86            |
| 23  |            | 8110.015   | 8104.164    | 5.85            |
| 26  |            | 8999.165   | 8995.313    | 3.85            |
| 27  |            | 9286.177   | 9284.359    | 1.82            |

**Figure S26.** (a) UVPD spectrum of 6- charge state ( $m/z$  1582) and (b) a-EPD spectrum of 6- charge state (UVPD of  $m/z$  1582 followed HCD of 5<sup>+</sup>- charge state of  $m/z$  1899) of hpDNA-AgC sample CCC CAA CTC CTT CCC GCC TTT TGG CGG G; (c) tabulated sequence ion assignments and mass error values (ppm for apo ions, Da for holo ions). Holo ions once again show systematic mass error values of 1.8, 2.8, 3.8, 4.8, 5.8 Da due to interference of AgC with isotopic deconvolution algorithm.

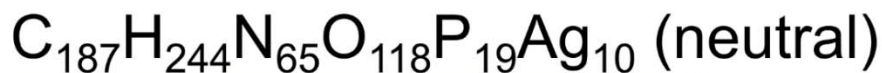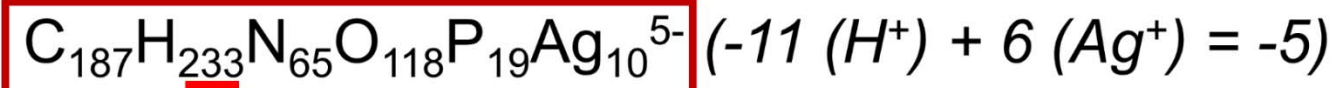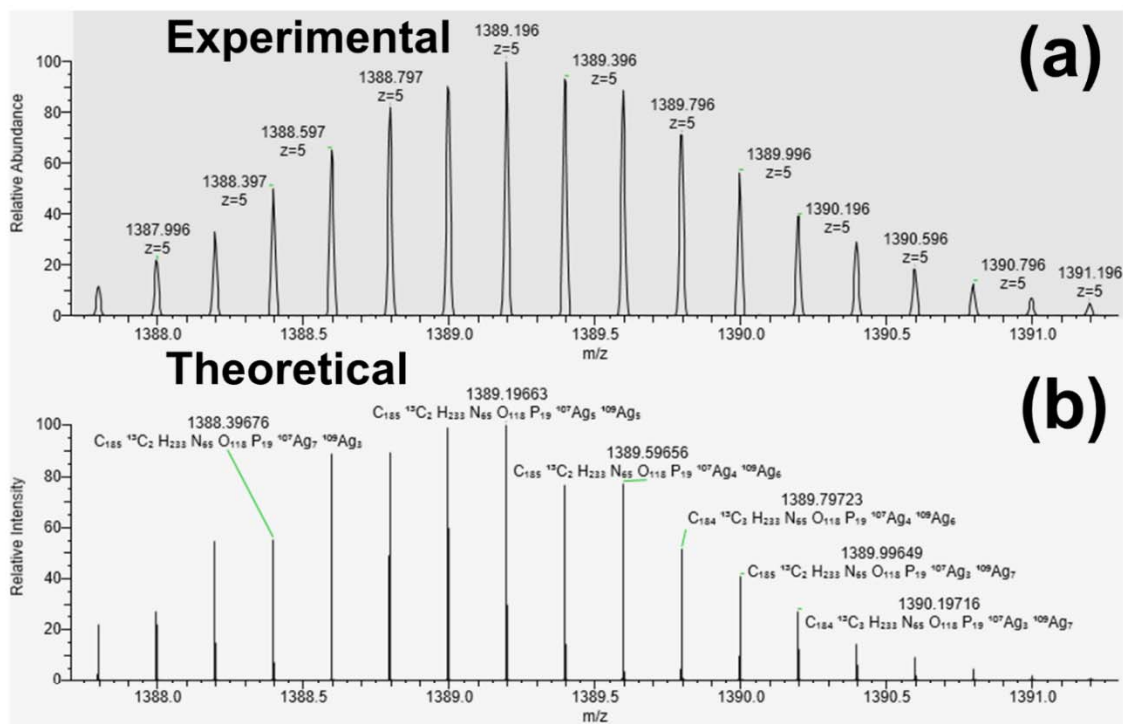

**(c)**

ssDNA+Ag10 (5- charge state)

|           |          |          |          |          |          |          |          |          |          |          |          |          |
|-----------|----------|----------|----------|----------|----------|----------|----------|----------|----------|----------|----------|----------|
| Exp m/z   | 1387.996 | 1388.197 | 1388.397 | 1388.597 | 1388.797 | 1388.997 | 1389.196 | 1389.396 | 1389.596 | 1389.796 | 1389.996 | 1390.196 |
| Theo m/z  | 1387.995 | 1388.196 | 1388.397 | 1388.596 | 1388.797 | 1388.996 | 1389.197 | 1389.396 | 1389.597 | 1389.797 | 1389.996 | 1390.197 |
| ppm error | 0.7      | 0.7      | 0.0      | 0.7      | 0.0      | 0.7      | -0.7     | 0.0      | -0.7     | -0.7     | 0.0      | -0.7     |

**Figure S27.** (a) Experimental and (b) theoretical isotopic distributions of ssDNA-AgC (5- charge state) along with (c) calculated ppm error values. The results highlight the contribution of the partially oxidized  $\text{Ag}_{10}^{6+}$  cluster to overall negatively-charged DNA-AgC complex.



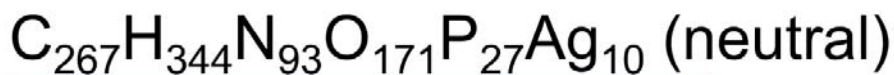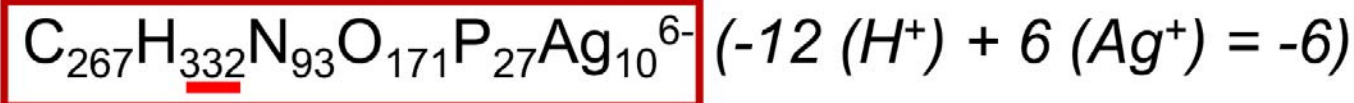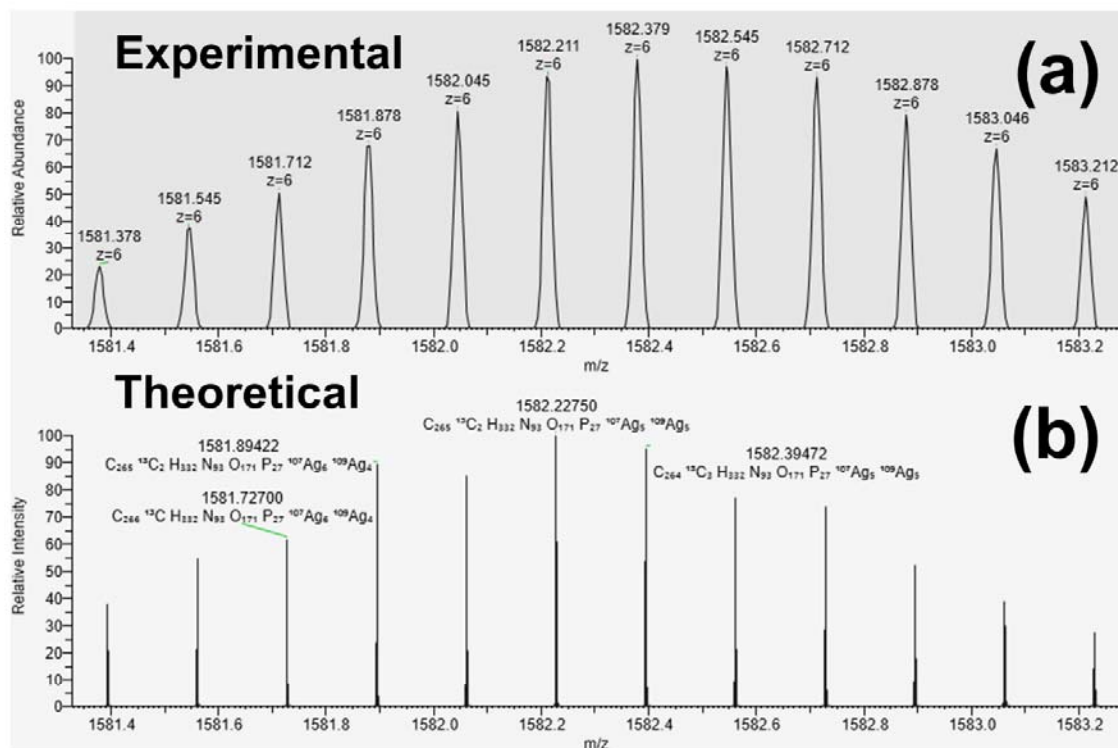

(c)

| hpDNA+Ag10 (6- charge state) |          |          |          |          |          |          |          |          |          |          |          |
|------------------------------|----------|----------|----------|----------|----------|----------|----------|----------|----------|----------|----------|
| Exp m/z                      | 1581.545 | 1581.712 | 1581.878 | 1582.045 | 1582.211 | 1582.379 | 1582.545 | 1582.712 | 1582.878 | 1583.046 | 1583.212 |
| Theo m/z                     | 1581.561 | 1581.727 | 1581.894 | 1582.061 | 1582.228 | 1582.395 | 1582.561 | 1582.728 | 1582.895 | 1583.061 | 1583.229 |
| ppm error                    | 10.1     | 9.5      | 10.3     | 10.4     | 10.4     | 9.9      | 10.0     | 10.1     | 10.9     | 9.7      | 10.4     |

**Figure S28.** (a) Experimental and (b) theoretical isotopic distributions of hpDNA-AgC (6- charge state) along with (c) calculated ppm error values. The results highlight the contribution of the partially oxidized  $\text{Ag}_{10}^{6+}$  cluster to overall negatively-charged DNA-AgC complex

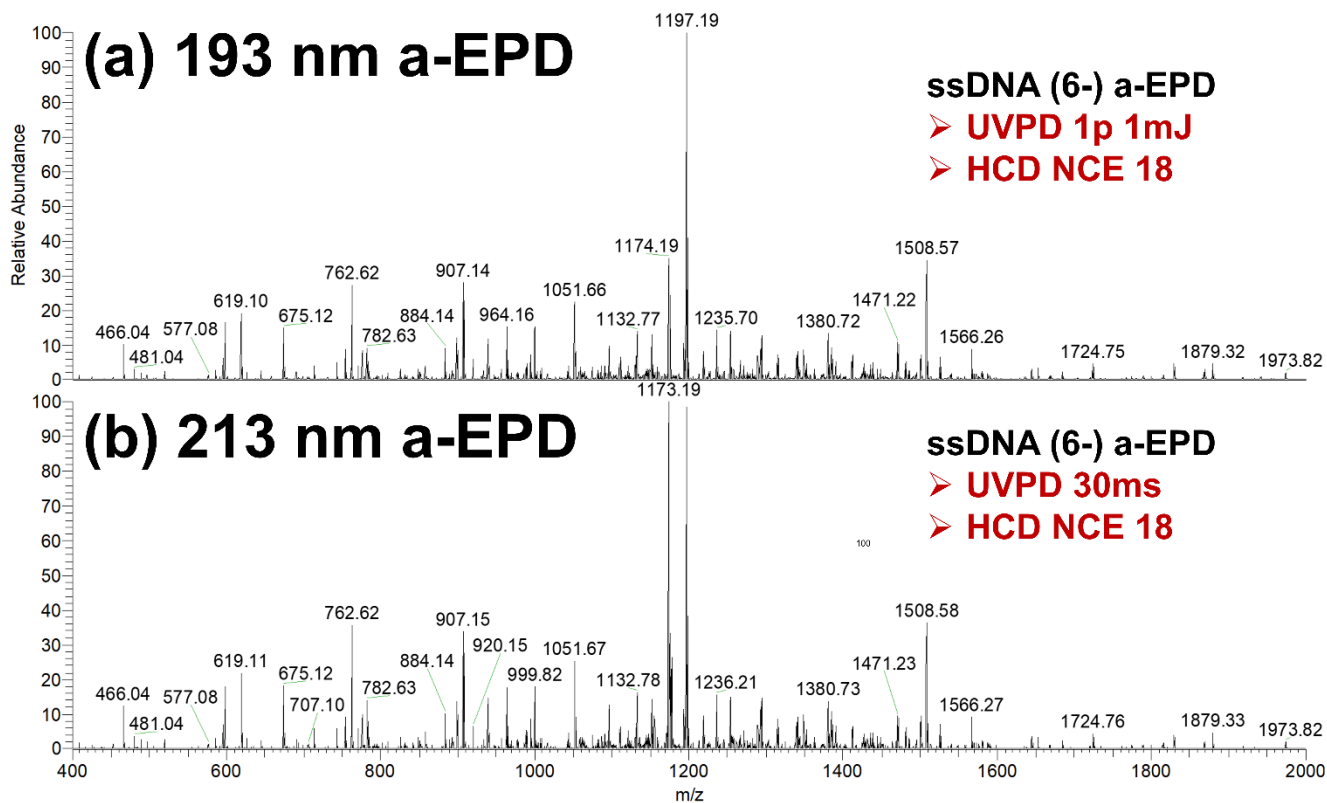

**(c) 193 nm a-EPD  
Deconvoluted**

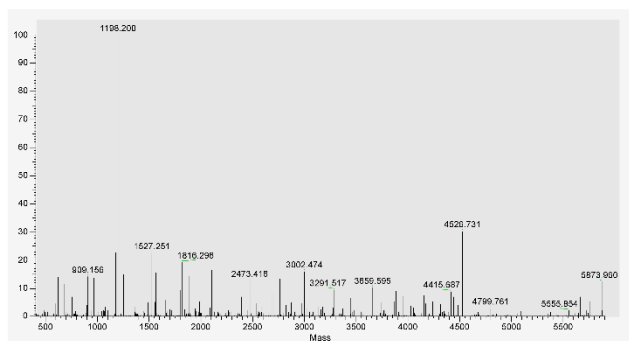

**(d) 213 nm a-EPD  
Deconvoluted**

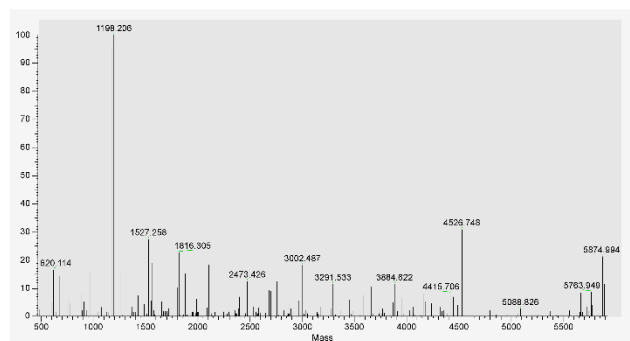

**Figure S29.** Comparison of 213 and 193 nm a-EPD for characterization of the 6- charge state of the ssDNA (CCC CAA CTC CTT CCC GCC AC): **(a)** 193 nm a-EPD spectrum, **(b)** 213 nm a-EPD spectrum, **(c)** deconvoluted 193 nm a-EPD spectrum, **(d)** deconvoluted 213 nm a-EPD spectrum. a-EPD was performed *via* UVPD of the 6- charge state ( $m/z$  978), and subsequent HCD of the 5 $\bullet$ - ion ( $m/z$  1174).
